# Supplementary material for: Social inequalities and dynamics of the early COVID-19 epidemic: a prospective cohort study in France
Source: PubMed Central journal article supplement — BMJ Open. 2021 Nov 10;11(11):e052888. doi: 10.1136/bmjopen-2021-052888 (PMC8587531; doi:10.1136/bmjopen-2021-052888), 2021-11-10
Supplement: bmjopen-2021-052888.draft_revisions.pdf [file bmjopen-2021-052888.draft_revisions.pdf]

# BMJ Open

BMJ Open is committed to open peer review. As part of this commitment we make the peer review history of every article we publish publicly available.

When an article is published we post the peer reviewers' comments and the authors' responses online. We also post the versions of the paper that were used during peer review. These are the versions that the peer review comments apply to.

The versions of the paper that follow are the versions that were submitted during the peer review process. They are not the versions of record or the final published versions. They should not be cited or distributed as the published version of this manuscript.

BMJ Open is an open access journal and the full, final, typeset and author-corrected version of record of the manuscript is available on our site with no access controls, subscription charges or pay-per-view fees (<http://bmjopen.bmj.com>).

If you have any questions on BMJ Open's open peer review process please email [info.bmjopen@bmj.com](mailto:info.bmjopen@bmj.com)

# BMJ Open

## Social Inequalities and Dynamics of the early COVID-19 Epidemic. Evidence from France.

|                               |                                                                                                                                                                                                                                                                                                                                                                                                                                                                                                                                                                                                                              |
|-------------------------------|------------------------------------------------------------------------------------------------------------------------------------------------------------------------------------------------------------------------------------------------------------------------------------------------------------------------------------------------------------------------------------------------------------------------------------------------------------------------------------------------------------------------------------------------------------------------------------------------------------------------------|
| Journal:                      | <i>BMJ Open</i>                                                                                                                                                                                                                                                                                                                                                                                                                                                                                                                                                                                                              |
| Manuscript ID                 | bmjopen-2021-052888                                                                                                                                                                                                                                                                                                                                                                                                                                                                                                                                                                                                          |
| Article Type:                 | Original research                                                                                                                                                                                                                                                                                                                                                                                                                                                                                                                                                                                                            |
| Date Submitted by the Author: | 28-Apr-2021                                                                                                                                                                                                                                                                                                                                                                                                                                                                                                                                                                                                                  |
| Complete List of Authors:     | Bajos, Nathalie; Institut de recherche interdisciplinaire sur les enjeux sociaux; INSERM<br>Counil, Emilie; INED<br>Franck, Jeanna-eve; Institut de recherche interdisciplinaire sur les enjeux sociaux; INSERM<br>Jusot, Florence; Université Paris Dauphine<br>Pailhé, Ariane; INED<br>Spire, Alexis; Institut de recherche interdisciplinaire sur les enjeux sociaux; INSERM<br>Martin, Claude; CNRS, UMR 6051; EHESP<br>Lydie, Nathalie; Santé publique France<br>Slama, Remy; Université Grenoble Alpes; INSERM<br>Meyer, Laurence; CESP; Université Paris-Saclay<br>Warszawski, Josiane; CESP; Université Paris-Saclay |
| Keywords:                     | COVID-19, Public health < INFECTIOUS DISEASES, SOCIAL MEDICINE                                                                                                                                                                                                                                                                                                                                                                                                                                                                                                                                                               |
|                               |                                                                                                                                                                                                                                                                                                                                                                                                                                                                                                                                                                                                                              |

SCHOLARONE™  
Manuscripts

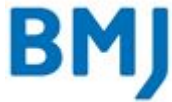

I, the Submitting Author has the right to grant and does grant on behalf of all authors of the Work (as defined in the below author licence), an exclusive licence and/or a non-exclusive licence for contributions from authors who are: i) UK Crown employees; ii) where BMJ has agreed a CC-BY licence shall apply, and/or iii) in accordance with the terms applicable for US Federal Government officers or employees acting as part of their official duties; on a worldwide, perpetual, irrevocable, royalty-free basis to BMJ Publishing Group Ltd ("BMJ") its licensees and where the relevant Journal is co-owned by BMJ to the co-owners of the Journal, to publish the Work in this journal and any other BMJ products and to exploit all rights, as set out in our [licence](#).

The Submitting Author accepts and understands that any supply made under these terms is made by BMJ to the Submitting Author unless you are acting as an employee on behalf of your employer or a postgraduate student of an affiliated institution which is paying any applicable article publishing charge ("APC") for Open Access articles. Where the Submitting Author wishes to make the Work available on an Open Access basis (and intends to pay the relevant APC), the terms of reuse of such Open Access shall be governed by a Creative Commons licence – details of these licences and which [Creative Commons](#) licence will apply to this Work are set out in our licence referred to above.

Other than as permitted in any relevant BMJ Author's Self Archiving Policies, I confirm this Work has not been accepted for publication elsewhere, is not being considered for publication elsewhere and does not duplicate material already published. I confirm all authors consent to publication of this Work and authorise the granting of this licence.

1  
2  
3 Title: Social Inequalities and Dynamics of the early COVID-19 Epidemic. Evidence from  
4 France.  
5  
6  
7

### 8 Authors

9  
10 Nathalie Bajos, PhD<sup>1</sup>, Emilie Council\*, PhD<sup>2</sup>, Jeanna-Eve Franck\*, PhD<sup>3</sup>, Florence Jusot<sup>3</sup>, Ariane  
11 Pailhé, PhD<sup>2</sup>, Alexis Spire, PhD<sup>1</sup>, Claude Martin, PhD<sup>4</sup>, Nathalie Lydié, PhD<sup>5</sup>, Rémy Slama<sup>6</sup>,  
12 PhD, Laurence Meyer, PhD<sup>7</sup>, Josiane Warszawski, PhD<sup>7</sup>; for the EpiCoV study group\*\*  
13  
14  
15

### 16 Affiliations

17  
18  
19 <sup>1</sup> IRIS, Inserm/EHESS/CNRS, Aubervilliers, France.

20  
21 <sup>2</sup> Ined, Aubervilliers, France.

22  
23 <sup>3</sup> Université Paris Dauphine, Paris, France.

24  
25 <sup>4</sup> ARENES UMR 6051, CNRS, EHESP, Rennes, France.

26  
27 <sup>5</sup> Santé publique France, Saint-Maurice, France.

28  
29 <sup>6</sup> University Grenoble Alpes, Inserm, CNRS, Institute for Advanced Biosciences, Grenoble,  
30 France.

31  
32 <sup>7</sup> CESP UMR 1018, Université Paris-Saclay, APHP, le Kremlin-Bicêtre, France.  
33  
34

35 **\*These authors contributed equally to this work**

### 36 **\*\*The EpiCoV study group**

37 EpiCoV study group: Nathalie Bajos (co-principal investigator), Josiane Warszawski (co-  
38 principal investigator), Guillaume Bagein, Muriel Barlet, François Beck, Emilie Council, Florence  
39 Jusot, Aude Leduc, Nathalie Lydie, Claude Martin, Laurence Meyer, Ariane Pailhé, Nicolas  
40 Palioud, Delphine Rahib, Philippe Raynaud, Alexandra Rouquette, Patrick Sicard, Rémy Slama,  
41 Alexis Spire.  
42  
43  
44

### 45 Correspondence to

46  
47  
48 Dr Nathalie Bajos, Institut de Recherche Interdisciplinaire sur les enjeux Sociaux - Sciences  
49 sociales, politique, santé, IRIS (UMR 8156 CNRS - EHESS - U997 Inserm) 5 cours des  
50 humanités, 93322 Aubervilliers cedex, France.

51 Tel: +33 (0)6 66 32 30 00. nathalie.bajos@inserm.fr  
52  
53

### 54 Word count

55  
56 Abstract (286), text (3,072), references (37)  
57  
58  
59  
60

**ABSTRACT**

**Objective** Although social inequalities in COVID-19 mortality by race, gender and socioeconomic status are well documented, less is known about social disparities in infection rates and their shift over time. We aim to study the evolution of social disparities in infection at the early stage of the epidemic in France with regard to the policies implemented.

**Design** Random population-based prospective cohort.

**Setting** From May to June 2020 in France.

**Participants** Adults included in the EpiCoV cohort (n=77,588).

**Main outcome measures** Self-reported anosmia and/or ageusia in three categories: no symptom, during the first epidemic peak (in March 2020) or thereafter (during lockdown).

**Results** In all, 2,045 participants (1.53%) reported anosmia/ageusia. The social distribution of exposure factors (density of place of residence, overcrowded housing and working outside the home) was described. Multinomial regressions were used to identify changes in social variables (gender, class and race) associated with symptoms of anosmia/ageusia. Women were more likely to report symptoms during the peak and after. Racialized minorities accumulated more exposure risk factors than the mainstream population and were at higher risk of anosmia/ageusia during the peak and after. By contrast, senior executive professionals were the least exposed to the virus with the lower rate of working outside the home during lockdown. They were more affected than lower social classes at the peak of the epidemic, but this effect disappeared after the peak.

**Conclusion** The shift in the social profile of the epidemic was related to a shift in exposure factors under the implementation of a stringent stay-at-home order. Our study shows the importance to consider in a dynamic way the gender, socioeconomic and race direct and indirect effects of the COVID-19 pandemic, notably to implement policies that do not widen health inequalities.

**Keywords:** COVID-19; Social inequalities; Gender; Social class; Race

## ARTICLE SUMMARY

### Strengths and limitations of the study

- EpiCoV is a large random socio-epidemiological prospective cohort including both detailed social characteristics, exposure risk factors and date of first COVID-19-Like symptom(s), enabling us to study the dynamic of the pandemic social profile.
- We focused on the most specific symptoms of SARS-CoV2 infection - anosmia/ageusia - which makes our analyses more robust.
- Our outcome is based on reported symptoms rather than on biologically confirmed cases due to the lack of tests at the time of the survey.
- Highly vulnerable populations, such as homeless people, are not represented in our sample.

## INTRODUCTION

The COVID-19 pandemic that has been hitting the world since the beginning of the year 2020 has reinforced and strengthened social inequalities in health<sup>1-3</sup>. This evidence mostly comes from mortality-based studies<sup>4 5</sup>. Few studies are based on the incidence of COVID-19<sup>6</sup>, while the disease has an infection case-fatality ratio below 1%<sup>7</sup>. Most of these analyses are from the USA and the UK, which have strong specificities in terms of healthcare systems and social and ethnic inequalities. They are based on ecological studies, not allowing to consider socioeconomic inequalities at the individual level and to adjust for potential confounders<sup>4</sup>. In addition, the literature very little addressed the dynamics of social inequalities as the epidemic evolves and prevention measures are implemented, measures that may themselves have differential efficiency across social and ethnic groups and between sexes. Notable exceptions are Wright et al<sup>8</sup> (in the United Kingdom) and Jefferies et al<sup>9</sup> (in New-Zealand), who found trends towards lower risk of suspected COVID-19 and lower testing rates of SARS-CoV-2 among people of lower socioeconomic status during the early weeks of the epidemic and a higher risk and higher testing rates subsequently.

Few studies showed that the prevention policies put in place, in particular the mobility restrictions and the strong incentive to work remotely, were more beneficial to the most privileged classes in terms of disease incidence<sup>10 11</sup>. This suggests that the social distribution of exposure factors may had changed over time, as has been previously found for other influenza pandemics<sup>12 13</sup>.

Our objective was to study the dynamics of gender, race and social class-related inequalities in COVID-19 disease incidence at the early stage of the epidemic in France. We adopted an intersectional approach<sup>14</sup> that simultaneously takes into account these three social factors<sup>15</sup>.

1  
2  
3 We first compared the occurrence of reported anosmia and/or ageusia - a specific proxy of  
4 disease incidence - by socio-demographic characteristics between the first peak of the  
5 epidemic, around March 19<sup>th</sup>, until the beginning of June 2020, when the incidence decreased  
6 following the first lockdown<sup>16</sup>. Then we studied how the distribution of three important risk  
7 factors of COVID-19 exposure and infection, *i.e.* population density, overcrowded housing and  
8 working outside the home<sup>17</sup>, varied across socio-demographic groups. Finally, we studied how  
9 the association of social characteristics with anosmia/ageusia evolved during and after the  
10 epidemic peak while adjusting for exposure risk factors and health variables.  
11  
12  
13  
14  
15  
16  
17  
18  
19  
20  
21  
22  
23

## 24 **PARTICIPANTS AND METHODS**

### 25 **Study design and participants**

26  
27 The EpiCoV (Epidémiologie et Conditions de Vie) cohort was set-up in April 2020, with the  
28 general aim of understanding the main epidemiological, social and behavioral features of the  
29 COVID-19 epidemic in France. The data collection period ran from May 2<sup>nd</sup> to June 2<sup>nd</sup>, 2020.  
30  
31 In France, strict lockdown expanded from March the 17<sup>th</sup> to May the 10<sup>th</sup> and the first  
32 epidemic peak was recorded around March 19<sup>th</sup><sup>16</sup>.  
33  
34  
35  
36  
37  
38  
39

40  
41 A stratified random sample of 350,000 people aged 15 and over was drawn from the tax  
42 database of the National Institute of Statistics and Economic Studies (INSEE), which covers  
43 96% of the population living in France, but excludes people living in institutional settings.  
44  
45 People belonging to the lowest decile of income were over-represented. A total of 134,391  
46 (38.4%) participated in the survey. Individuals were invited to answer the questionnaire  
47 online, or by phone if they did not have Internet access.  
48  
49  
50  
51  
52  
53  
54

55 We used reweighting and marginal calibrations in the survey and sampling design to correct  
56 for non-participation bias. We focused on people living in metropolitan France, aged 18-64  
57  
58  
59  
60



1  
2  
3 years, in order to take into account working arrangements and type of occupation in the  
4  
5 analysis (n=98,787).  
6

### 7 8 **Ethical statement** 9

10 The survey was approved by the CNIL (French independent administrative authority  
11 responsible for data protection) on April 25<sup>th</sup> 2020 (ref: MLD/MFI/AR205138) and by the  
12  
13 “Comité de protection des personnes” (French equivalent of the Research Ethics Committee)  
14  
15 on April 24<sup>th</sup>. The survey also obtained an agreement from the “Comité du Label de la  
16  
17 statistique publique”, proving its adequacy to statistical quality standards.  
18  
19  
20  
21

### 22 23 **Patient and public involvement** 24

25 Patients and/or the public were not involved in the design, or conduct, or reporting, or  
26  
27 dissemination plans of this research.  
28  
29

### 30 31 **Outcome** 32

33 Participants were invited to report COVID-19-Like symptoms (such as cough, fever, dyspnea,  
34  
35 anosmia and/or ageusia), if they were unusual and if they were present at or occurred since  
36  
37 the beginning of the lockdown. They also reported when the first symptom appeared. The  
38  
39 main health outcome studied here was reporting symptoms of anosmia and/or ageusia, the  
40  
41 most specific symptoms of SARS-CoV2 infection<sup>18 19 17</sup>. Among those who did not report  
42  
43 anosmia/ageusia, the analysis was restricted to people without reported cough, fever or  
44  
45 dyspnea in order to exclude possible COVID-19 cases (n=14,080). Individuals whose symptoms  
46  
47 started before lockdown were also not considered in the analysis to avoid overrepresentation  
48  
49 of long-lasting forms of COVID-19 (n=844).  
50  
51  
52

53  
54 A distinction was made between those people whose first symptoms began more than one  
55  
56 month before their response to the survey, likely to have occurred *during* the epidemic peak,  
57  
58 and those whose first symptoms began less than one month before, likely to have occurred  
59  
60

1  
2  
3 *after* the peak, during the epidemic decline phase (during and early after lockdown). Our  
4  
5 outcome was in three categories: no reported anosmia/ageusia (nor cough, fever or dyspnea),  
6  
7 anosmia/ageusia starting during the epidemic peak, anosmia/ageusia starting after the  
8  
9 epidemic peak.  
10  
11

### 12 **Socio-demographic variables**

13  
14 We considered the following six variables: age, sex, ethno-racial status (based on migration  
15  
16 history), social class (based on current or most recent occupation combined with education),  
17  
18 standard of living (based on decile of income per household consumption unit) and formal  
19  
20 education (defined according to the hierarchical grid of diplomas in France). The ethno-racial  
21  
22 status distinguished mainstream population, *i.e.* persons residing in metropolitan France who  
23  
24 are neither immigrants nor native to French Overseas Departments (DOM, *i.e.* Martinique,  
25  
26 Guadeloupe, Reunion Island), nor descendants of immigrant(s) or of DOM native<sup>20</sup>. For the  
27  
28 minority population, a distinction was made according to the first (immigrants) and second  
29  
30 (descendants of immigrants) generations of immigration, and the country of origin. The term  
31  
32 racialized refers to people from the Maghreb, Turkey, Asia and Africa.  
33  
34  
35  
36  
37  
38  
39

### 40 **Exposure risk factors**

41  
42 We considered three main risk factors of exposure to COVID-19: high density of the place of  
43  
44 residence (*i.e.* at least 1,500 inhabitants per km<sup>2</sup> and a minimum of 50,000 inhabitants),  
45  
46 overcrowded housing (*i.e.* at least two persons living in housing with less than 18m<sup>2</sup> per  
47  
48 person) and having worked outside the home during lockdown (at least partly). Additional  
49  
50 explanatory variables included self-reported essential occupations and household size. To  
51  
52 account for regional variations in incidence, we distinguished between the least affected and  
53  
54 the three most affected regions at the time of the survey.  
55  
56  
57  
58

### 59 **Health variables**

1  
2  
3 Health variables included smoking habits, self-reported history of chronic diseases and body  
4  
5 mass index.  
6  
7

## 8 **Statistical analyses**

9  
10 We first studied the association between the three social variables of interest (gender, race,  
11  
12 social class) and anosmia/ageusia, distinguishing between the two periods, and then with the  
13  
14 exposure risk factors (density, overcrowding and working outside) using Chi<sup>2</sup>-test. To study  
15  
16 how the social characteristics associated with anosmia/ageusia evolved during and after the  
17  
18 epidemic peak, we further developed a step by step multinomial analysis adjusted for (i) age  
19  
20 and social variables (M0), (ii) then adding the three main exposure variables and regions (M1),  
21  
22 (iii) and finally adding health variables (M2).  
23  
24  
25

26  
27 Observations with missing values on anosmia/ageusia or main social and exposure variables  
28  
29 were excluded from our analysis (n=6275, 7.5%). In all, 77,588 individuals were included in  
30  
31 our analyses. All analyses were weighted using a Heckman model to take into account the  
32  
33 effect of the response mode on the reporting of COVID-19-Like symptoms<sup>21</sup>. Analyses were  
34  
35 performed with the SAS software 9.4. A P-value <0.05 was considered statistically significant.  
36  
37  
38  
39  
40  
41

## 42 **RESULTS**

### 43 *Gendered differences*

44  
45  
46 Women were more likely to have been affected by anosmia/ageusia: 1.84% of women versus  
47  
48 1.22% of men (p<0.01) (Table 1). Sex was not strongly associated with most risk factors of  
49  
50 anosmia/ageusia, with the exception of working outside home (44.7% in men *versus* 40.6% in  
51  
52 women, p<0.001) (Table 2). The significant association of anosmia/ageusia with gender only  
53  
54 weakly attenuated over time, with the crude odds ratio (OR) decreasing from 1.57 (95% CI:  
55  
56 1.40-1.76) to 1.40 (1.14-1.71) (Table 3). While adjusting for other social characteristics (M0),  
57  
58  
59  
60

1  
2  
3 exposure risk factors (M1) and health variables (M2) did not strongly attenuate the  
4  
5 association, inclusion of essential occupations did (Supplementary table 1).  
6  
7

### 8 *Ethno-racial status*

9

10 If we now consider ethno-racial affiliation, we find that all minority groups, to varying degrees  
11  
12 (from 1.79% to 2.67%, Table 1), reported anosmia more often than the majority population  
13  
14 (1.35%,  $p<0.001$ ).  
15  
16

17 Ethno-racial affiliation was strongly associated with exposure risk factors, with the exception  
18  
19 of working outside home. For example, 72.6% of the racialized first-generation immigrants  
20  
21 reported living in a high-density place of residence (compared to 31.8% for the mainstream  
22  
23 population,  $p<0.001$ ) and 41.4% in an overcrowded housing (compared to 8.7% for the  
24  
25 mainstream population,  $p<0.001$ , Table 2).  
26  
27  
28

29 Over-risk of reporting anosmia/ageusia was recorded among racialized minorities both during  
30  
31 and after the epidemic peak (crude models), although non-significant after the peak for non-  
32  
33 racialized second-generation immigrants and racialized first-generation immigrants (Table 3).  
34  
35

36 Adjusting for the exposure risk factors that significantly attenuated the observed associations,  
37  
38 both during and after the peak (M1). After further adjusting for health variables, only racialized  
39  
40 second-generation immigrants (respectively 1.48 (1.19-1.83) and 1.42 (1.00-2.01) during and  
41  
42 after the peak), DOM or descendants of DOM native (1.50 (1.07-2.12) during the peak) and  
43  
44 non-racialized first-generation immigrants (1.77 (1.04-3.04) after the peak) remained at higher  
45  
46 risk of reporting anosmia/ageusia compared to the mainstream population (M2).  
47  
48  
49  
50

### 51 *Social class*

52

53 There were marked differences between occupational classes. The top categories appeared  
54  
55 to be most affected by anosmia/ageusia: 1.89% for middle executive professionals, 1.81% for  
56  
57  
58  
59  
60

1  
2  
3 senior executive professionals and 1.83% for skilled employees, against 0.99% for skilled and  
4  
5 1.11% for low-skilled manual workers (Table 1).  
6  
7

8 These social groups are differently exposed to risk factors. Although senior executive  
9  
10 professionals are more likely to live in high-density areas than low-skilled manual workers  
11  
12 (53.5% compared to 27.4%), they are less likely to live in an overcrowded accommodation  
13  
14 (10.3% compared to 17.5%) and have more often been able to telework during the lockdown  
15  
16 (39.2% have worked outside the home compared to 56.9% for low-skilled manual workers,  
17  
18 Table 2).  
19  
20  
21

22 Marked evolutions are observed over time. In crude models, while the lower social categories  
23  
24 and self-employed were significantly less affected than senior executive professionals during  
25  
26 the peak, this most privileged social category did not appear to be more at risk of  
27  
28 anosmia/ageusia than the others after the peak (Table 3). Only middle executive professionals  
29  
30 were at increased risk after the peak, and only simultaneous adjustment on exposure risk  
31  
32 factors, health variables, essential occupations and regions lowered this association towards  
33  
34 the null (Supplementary Table 1).  
35  
36  
37  
38  
39  
40  
41  
42  
43  
44  
45  
46  
47  
48  
49  
50  
51  
52  
53  
54  
55  
56  
57  
58  
59  
60

Table 1. Socio-demographic characteristics associated with anosmia/ageusia

|                                               | <i>Anosmia/a<br/>geusia<sup>i</sup></i><br>n=2,052<br>(1.53%) | <i>P-value*</i>  | <i>Anosmia/ageu<br/>sia during peak</i><br>n=1,521<br>(1.12%) | <i>Anosmia/a<br/>geusia<br/>after peak</i><br>n=531<br>(0.41%) |
|-----------------------------------------------|---------------------------------------------------------------|------------------|---------------------------------------------------------------|----------------------------------------------------------------|
| <b>Age</b>                                    |                                                               | <b>&lt;0.001</b> |                                                               |                                                                |
| 18-24                                         | 253 (1.27)                                                    |                  | 168 (0.86)                                                    | 85 (0.41)                                                      |
| 25-34                                         | 431 (1.92)                                                    |                  | 322 (1.43)                                                    | 109 (0.48)                                                     |
| 35-44                                         | 510 (1.83)                                                    |                  | 379 (1.33)                                                    | 131 (0.50)                                                     |
| 45-54                                         | 521 (1.57)                                                    |                  | 407 (1.22)                                                    | 114 (0.35)                                                     |
| 55-64                                         | 337 (1.07)                                                    |                  | 245 (0.76)                                                    | 92 (0.31)                                                      |
| <b>Sex</b>                                    |                                                               | <b>&lt;0.001</b> |                                                               |                                                                |
| Men                                           | 773 (1.22)                                                    |                  | 570 (0.88)                                                    | 203 (0.34)                                                     |
| Women                                         | 1,279 (1.84)                                                  |                  | 951 (1.37)                                                    | 328 (0.47)                                                     |
| <b>Ethno-racial status</b>                    |                                                               | <b>&lt;0.001</b> |                                                               |                                                                |
| Mainstream population                         | 1,454 (1.35)                                                  |                  | 1,075 (0.98)                                                  | 379 (0.36)                                                     |
| Non-racialized first-generation immigrants    | 94 (2.20)                                                     |                  | 69 (1.48)                                                     | 25 (0.72)                                                      |
| Non-racialized second-generation immigrants   | 108 (1.79)                                                    |                  | 80 (1.37)                                                     | 28 (0.42)                                                      |
| Racialized first-generation immigrants        | 164 (1.86)                                                    |                  | 127 (1.43)                                                    | 37 (0.43)                                                      |
| Racialized second generation immigrants       | 170 (2.62)                                                    |                  | 125 (1.95)                                                    | 45 (0.67)                                                      |
| DOM or descendants of DOM native-             | 62 (2.67)                                                     |                  | 45 (1.95)                                                     | 17 (0.72)                                                      |
| <b>Social class</b>                           |                                                               | <b>&lt;0.001</b> |                                                               |                                                                |
| Self-employed and entrepreneurs               | 92 (1.39)                                                     |                  | 63 (0.91)                                                     | 29 (0.48)                                                      |
| Senior executive professionals                | 454 (1.81)                                                    |                  | 365 (1.45)                                                    | 89 (0.37)                                                      |
| Middle executive professionals                | 434 (1.89)                                                    |                  | 313 (1.35)                                                    | 121 (0.54)                                                     |
| Skilled employees                             | 203 (1.83)                                                    |                  | 160 (1.44)                                                    | 43 (0.39)                                                      |
| Low-skilled employees                         | 356 (1.56)                                                    |                  | 254 (1.10)                                                    | 102 (0.45)                                                     |
| Skilled manual workers                        | 125 (0.99)                                                    |                  | 87 (0.68)                                                     | 38 (0.31)                                                      |
| Low-skilled manual workers                    | 62 (1.11)                                                     |                  | 38 (0.76)                                                     | 24 (0.34)                                                      |
| Never worked and others                       | 326 (1.28)                                                    |                  | 241 (0.93)                                                    | 85 (0.35)                                                      |
| <b>Standard of living (in deciles)</b>        |                                                               | <b>0.003</b>     |                                                               |                                                                |
| D1                                            | 209 (1.41)                                                    |                  | 140 (0.92)                                                    | 69 (0.49)                                                      |
| D2-D3                                         | 316 (1.33)                                                    |                  | 221 (0.94)                                                    | 95 (0.39)                                                      |
| D4-D5                                         | 349 (1.49)                                                    |                  | 255 (1.10)                                                    | 94 (0.39)                                                      |
| D6-D7                                         | 389 (1.47)                                                    |                  | 295 (1.10)                                                    | 94 (0.37)                                                      |
| D8-D9                                         | 519 (1.77)                                                    |                  | 388 (1.32)                                                    | 131 (0.45)                                                     |
| D10                                           | 247 (1.74)                                                    |                  | 209 (1.46)                                                    | 38 (0.28)                                                      |
| <b>Formal education</b>                       |                                                               | <b>&lt;0.001</b> |                                                               |                                                                |
| No diploma                                    | 123 (1.43)                                                    |                  | 82 (0.89)                                                     | 41 (0.54)                                                      |
| Primary education                             | 74 (1.03)                                                     |                  | 53 (0.77)                                                     | 21 (0.25)                                                      |
| Vocational secondary                          | 335 (1.17)                                                    |                  | 229 (0.80)                                                    | 106 (0.36)                                                     |
| High school                                   | 467 (1.48)                                                    |                  | 330 (1.03)                                                    | 137 (0.44)                                                     |
| High school +2 to 4 years                     | 663 (1.82)                                                    |                  | 502 (1.38)                                                    | 161 (0.44)                                                     |
| High school +5 or more years                  | 390 (1.95)                                                    |                  | 325 (1.62)                                                    | 65 (0.33)                                                      |
| <b>Working arrangement during lockdown</b>    |                                                               | <b>&lt;0.001</b> |                                                               |                                                                |
| Not working and others                        | 669 (1.33)                                                    |                  | 484 (0.96)                                                    | 185 (0.38)                                                     |
| Remote working only                           | 376 (1.79)                                                    |                  | 308 (1.46)                                                    | 68 (0.33)                                                      |
| Working outside the home<br>partly or only    | 1,007 (1.62)                                                  |                  | 729 (1.16)                                                    | 278 (0.45)                                                     |
| <b>High density of the place of residence</b> |                                                               | <b>&lt;0.001</b> |                                                               |                                                                |
| No                                            | 1,078 (1.21)                                                  |                  | 778 (0.85)                                                    | 300 (0.36)                                                     |
| Yes                                           | 974 (2.04)                                                    |                  | 743 (1.56)                                                    | 231 (0.49)                                                     |
| <b>Overcrowded housing</b>                    |                                                               | <b>&lt;0.001</b> |                                                               |                                                                |
| No                                            | 1,719 (1.44)                                                  |                  | 1,280 (1.07)                                                  | 439 (0.37)                                                     |

|    |                                              |              |                  |            |
|----|----------------------------------------------|--------------|------------------|------------|
| 1  |                                              |              |                  |            |
| 2  |                                              |              |                  |            |
| 3  | Yes                                          | 333 (2.12)   | 241 (1.47)       | 92 (0.64)  |
| 4  | <b>Number of persons living in the house</b> |              | <b>&lt;0.001</b> |            |
| 5  | 1                                            | 232 (1.34)   | 175 (1.01)       | 57 (0.33)  |
| 6  | 2                                            | 472 (1.28)   | 348 (0.94)       | 124 (0.35) |
| 7  | 3-4                                          | 979 (1.61)   | 720 (1.17)       | 259 (0.44) |
| 8  | 5 or more                                    | 369 (1.95)   | 278 (1.46)       | 91 (0.49)  |
| 9  | <b>Essential occupation</b>                  |              | <b>&lt;0.001</b> |            |
| 10 | No                                           | 1,193 (1.39) | 908 (1.05)       | 285 (0.34) |
| 11 | Healthcare workers                           | 205 (2.94)   | 131 (1.78)       | 74 (1.16)  |
| 12 | Others                                       | 654 (1.61)   | 482 (1.18)       | 172 (0.43) |
| 13 | <b>Region</b>                                |              | <b>&lt;0.001</b> |            |
| 14 | Least affected regions                       | 866 (1.04)   | 622 (0.73)       | 244 (0.31) |
| 15 | Grand Est                                    | 305 (2.15)   | 242 (1.72)       | 63 (0.43)  |
| 16 | Hauts-de-France                              | 215 (1.50)   | 147 (1.03)       | 68 (0.47)  |
| 17 | Ile-de-France                                | 666 (2.85)   | 510 (2.16)       | 156 (0.68) |

Significant Chi-2 tests are indicated in bold.

i: symptoms were recorded if they occurred between the 17<sup>th</sup> of March, 2020 and the date of survey (from 2<sup>nd</sup> of May to 2<sup>nd</sup> of June, 2020).

\*Chi-2 test for anosmia/ageusia during the whole period (yes, no).

Table 2. Socio-demographic characteristics associated with COVID-19 risk factors

|                                                | High density of<br>the place of<br>residence<br><i>n</i> =27,104<br>(38.6%) | Overcrowded<br>housing<br><i>n</i> =8,430 (13.2%) | Worked outside<br>the home during<br>lockdown<br><i>n</i> =37,129<br>(47.7%) |
|------------------------------------------------|-----------------------------------------------------------------------------|---------------------------------------------------|------------------------------------------------------------------------------|
| <b>Age (years)</b>                             |                                                                             |                                                   |                                                                              |
| 18-24                                          | 3,506 (38.5)                                                                | 1,225 (13.9)                                      | 2,794 (27.5)                                                                 |
| 25-34                                          | 5,504 (47.2)                                                                | 2,051 (18.1)                                      | 6,366 (50.1)                                                                 |
| 35-44                                          | 6,128 (39.8)                                                                | 2,786 (19.8)                                      | 9,239 (56.0)                                                                 |
| 45-54                                          | 6,298 (35.7)                                                                | 1,748 (11.6)                                      | 11,374 (59.0)                                                                |
| 55-64                                          | 5,668 (33.5)                                                                | 620 (4.5)                                         | 7,356 (39.1)                                                                 |
| <b>Sex</b>                                     |                                                                             |                                                   |                                                                              |
| Men                                            | 12,404 (38.1)                                                               | 3,880 (13.1)                                      | 18,148 (50.6)                                                                |
| Women                                          | 14,700 (39.0)                                                               | 4,550 (13.4)                                      | 18,981 (44.7)                                                                |
| <b>Ethno-racial status</b>                     |                                                                             |                                                   |                                                                              |
| Mainstream population                          | 18,772 (31.8)                                                               | 4,823 (8.7)                                       | 30,625 (49.0)                                                                |
| Non-racialized first-generation<br>immigrants  | 1,128 (51.0)                                                                | 432 (21.3)                                        | 1,100 (47.0)                                                                 |
| Non-racialized second-generation<br>immigrants | 1,391 (40.1)                                                                | 360 (11.0)                                        | 1,815 (48.1)                                                                 |
| Racialized first-generation<br>immigrants      | 2,894 (72.6)                                                                | 1,655 (41.4)                                      | 1,744 (41.4)                                                                 |
| Racialized second generation<br>immigrants     | 2,297 (68.0)                                                                | 954 (29.2)                                        | 1,303 (37.4)                                                                 |
| DOM or descendants of DOM native               | 622 (56.6)                                                                  | 206 (20.5)                                        | 542 (48.5)                                                                   |
| <b>Social class</b>                            |                                                                             |                                                   |                                                                              |
| Self-employed and entrepreneurs                | 1,133 (32.0)                                                                | 390 (11.7)                                        | 2,671 (68.1)                                                                 |
| Senior executive professionals                 | 7,959 (53.5)                                                                | 1,373 (10.3)                                      | 6,448 (39.2)                                                                 |
| Middle executive professionals                 | 4,633 (36.4)                                                                | 1,235 (10.2)                                      | 8,142 (57.9)                                                                 |
| Skilled employees                              | 2,494 (41.2)                                                                | 708 (12.2)                                        | 3,543 (52.0)                                                                 |
| Low-skilled employees                          | 3,885 (36.1)                                                                | 1,498 (13.7)                                      | 7,562 (58.1)                                                                 |
| Skilled manual workers                         | 1,589 (28.7)                                                                | 862 (15.0)                                        | 4,466 (66.1)                                                                 |
| Low-skilled manual workers                     | 743 (27.4)                                                                  | 515 (17.5)                                        | 1,843 (56.9)                                                                 |
| Never worked and others                        | 4,668 (38.9)                                                                | 1,849 (16.7)                                      | 2,454 (16.6)                                                                 |
| <b>Standard of living (in deciles)</b>         |                                                                             |                                                   |                                                                              |
| D1                                             | 3,068 (46.9)                                                                | 1,794 (28.2)                                      | 2,796 (34.7)                                                                 |
| D2-D3                                          | 4,082 (40.4)                                                                | 2,317 (22.1)                                      | 5,405 (45.5)                                                                 |
| D4-D5                                          | 3,761 (33.1)                                                                | 1,506 (12.8)                                      | 7,065 (53.4)                                                                 |
| D6-D7                                          | 4,512 (31.9)                                                                | 1,262 (8.5)                                       | 8,595 (54.6)                                                                 |
| D8-D9                                          | 6,586 (37.7)                                                                | 1,100 (6.3)                                       | 8,973 (47.7)                                                                 |
| D10                                            | 4,773 (49.8)                                                                | 385 (4.3)                                         | 4,032 (40.1)                                                                 |
| <b>Formal education</b>                        |                                                                             |                                                   |                                                                              |
| No diploma                                     | 1,790 (42.9)                                                                | 1,065 (24.7)                                      | 2,052 (42.3)                                                                 |
| Primary education                              | 1,093 (34.8)                                                                | 455 (13.5)                                        | 1,375 (39.4)                                                                 |
| Vocational secondary                           | 3,670 (27.0)                                                                | 1,613 (12.1)                                      | 8,848 (56.9)                                                                 |
| High school                                    | 5,356 (34.4)                                                                | 2,036 (13.2)                                      | 8,810 (48.9)                                                                 |
| High school +2 to 4 years                      | 8,007 (39.0)                                                                | 1,991 (10.5)                                      | 11,252 (49.0)                                                                |
| High school +5 or more years                   | 7,188 (61.1)                                                                | 1,270 (11.7)                                      | 4,792 (36.5)                                                                 |
| <b>Region</b>                                  |                                                                             |                                                   |                                                                              |
| Least affected regions                         | 11,829 (26.8)                                                               | 4,186 (10.3)                                      | 24,673 (51.0)                                                                |
| Grand Est                                      | 1,829 (26.4)                                                                | 551 (9.1)                                         | 3,814 (49.3)                                                                 |
| Hauts de France                                | 2,294 (34.2)                                                                | 858 (12.3)                                        | 3,631 (44.5)                                                                 |
| Ile-de-France                                  | 11,152 (83.4)                                                               | 2,835 (24.8)                                      | 5,011 (37.8)                                                                 |



1  
2  
3  
4  
5  
6  
7  
8  
9  
10  
11  
12  
13  
14  
15  
16  
17  
18  
19  
20  
21  
22  
23  
24  
25  
26  
27  
28  
29  
30  
31  
32  
33  
34  
35  
36  
37  
38  
39  
40  
41  
42  
43  
44  
45  
46  
47  
48  
49  
50  
51  
52  
53  
54  
55  
56  
57  
58  
59  
60

All socio-demographic variables were significantly associated with each three COVID-19 exposure risk factors (P-value <0.001, Chi-2 tests), except sex with high density (P-value=0.051) and overcrowded housing (P-value=0.30).

For peer review only

Table 3. Factors associated with anosmia/ageusia during or after the first epidemic peak (as compared to no reported anosmia/ageusia starting after lockdown). Multinomial logistic regressions.

|                                             | Crude model             |                         | M0<br>+ Social variables |                         | M1<br>+ Exposure variables <sup>a</sup> |                         | M2<br>+ Health variables |                         |
|---------------------------------------------|-------------------------|-------------------------|--------------------------|-------------------------|-----------------------------------------|-------------------------|--------------------------|-------------------------|
|                                             | <i>During peak</i>      | <i>After peak</i>       | <i>During peak</i>       | <i>After peak</i>       | <i>During peak</i>                      | <i>After peak</i>       | <i>During peak</i>       | <i>After peak</i>       |
|                                             | <i>OR (95% CI)</i>      | <i>OR (95% CI)</i>      | <i>OR (95% CI)</i>       | <i>OR (95% CI)</i>      | <i>OR (95% CI)</i>                      | <i>OR (95% CI)</i>      | <i>OR (95% CI)</i>       | <i>OR (95% CI)</i>      |
| <b>Age</b>                                  |                         |                         |                          |                         |                                         |                         |                          |                         |
| 18-24                                       | 1                       | 1                       | 1                        | 1                       | 1                                       | 1                       | 1                        | 1                       |
| 25-34                                       | <b>1.68 (1.36-2.07)</b> | 1.18 (0.87-1.60)        | <b>1.44 (1.15-1.80)</b>  | 1.03 (0.77-1.47)        | <b>1.45 (1.16-1.82)</b>                 | 1.04 (0.73-1.48)        | <b>1.43 (1.14-1.80)</b>  | 0.93 (0.66-1.32)        |
| 35-44                                       | <b>1.56 (1.27-1.91)</b> | 1.22 (0.91-1.65)        | <b>1.36 (1.09-1.68)</b>  | 1.07 (0.76-1.51)        | <b>1.41 (1.13-1.76)</b>                 | 1.08 (0.76-1.52)        | <b>1.37 (1.10-1.72)</b>  | 0.90 (0.64-1.27)        |
| 45-54                                       | <b>1.43 (1.17-1.74)</b> | 0.86 (0.63-1.18)        | <b>1.30 (1.05-1.61)</b>  | <b>0.77 (0.54-1.09)</b> | <b>1.37 (1.10-1.70)</b>                 | 0.80 (0.55-1.14)        | <b>1.31 (1.05-1.63)</b>  | <b>0.63 (0.44-0.90)</b> |
| 55-64                                       | 0.89 (0.71-1.11)        | 0.76 (0.54-1.06)        | 0.84 (0.66-1.06)         | <b>0.67 (0.44-1.02)</b> | 0.91 (0.72-1.14)                        | 0.73 (0.47-1.12)        | 0.84 (0.66-1.07)         | <b>0.54 (0.36-0.82)</b> |
| <b>Sex</b>                                  |                         |                         |                          |                         |                                         |                         |                          |                         |
| Men                                         | 1                       | 1                       | 1                        | 1                       | 1                                       | 1                       | 1                        | 1                       |
| Women                                       | <b>1.57 (1.40-1.76)</b> | <b>1.40 (1.14-1.71)</b> | <b>1.52 (1.34-1.71)</b>  | <b>1.37 (1.10-1.70)</b> | <b>1.52 (1.35-1.72)</b>                 | <b>1.38 (1.11-1.71)</b> | <b>1.51 (1.34-1.70)</b>  | <b>1.42 (1.14-1.77)</b> |
| <b>Ethno-racial status</b>                  |                         |                         |                          |                         |                                         |                         |                          |                         |
| Mainstream population                       | 1                       | 1                       | 1                        | 1                       | 1                                       | 1                       | 1                        | 1                       |
| Non-racialized first-generation immigrants  | <b>1.52 (1.16-2.00)</b> | <b>2.00 (1.14-3.53)</b> | <b>1.55 (1.18-2.04)</b>  | <b>2.08 (1.18-3.65)</b> | 1.25 (0.95-1.65)                        | <b>1.71 (1.00-2.94)</b> | 1.26 (0.95-1.66)         | <b>1.77 (1.04-3.04)</b> |
| Non-racialized second-generation immigrants | <b>1.40 (1.07-1.82)</b> | 1.16 (0.77-1.76)        | <b>1.41 (1.09-1.84)</b>  | 1.17 (0.77-1.77)        | 1.26 (0.97-1.64)                        | 1.08 (0.71-1.63)        | 1.26 (0.96-1.64)         | 1.07 (0.71-1.62)        |
| Racialized first-generation immigrants      | <b>1.46 (1.18-1.80)</b> | 1.20 (0.82-1.75)        | <b>1.52 (1.23-1.88)</b>  | 1.24 (0.84-1.83)        | 1.08 (0.87-1.35)                        | 0.89 (0.60-1.33)        | 1.12 (0.89-1.40)         | 0.95 (0.64-1.42)        |
| Racialized second generation immigrants     | <b>2.01 (1.63-2.48)</b> | <b>1.87 (1.34-2.63)</b> | <b>1.97 (1.59-2.43)</b>  | <b>1.79 (1.27-2.51)</b> | <b>1.46 (1.18-1.81)</b>                 | 1.39 (0.98-1.98)        | <b>1.48 (1.19-1.83)</b>  | <b>1.42 (1.00-2.01)</b> |
| DOM or descendants of DOM native            | <b>2.01 (1.43-2.81)</b> | <b>2.02 (1.21-3.36)</b> | <b>1.96 (1.40-2.75)</b>  | <b>1.93 (1.16-3.24)</b> | <b>1.50 (1.07-2.11)</b>                 | 1.56 (0.93-2.60)        | <b>1.50 (1.07-2.12)</b>  | 1.50 (0.89-2.52)        |
| <b>Social class</b>                         |                         |                         |                          |                         |                                         |                         |                          |                         |
| Self-employed and entrepreneurs             | <b>0.62 (0.47-0.83)</b> | 1.30 (0.77-2.19)        | <b>0.66 (0.49-0.88)</b>  | 1.35 (0.81-2.27)        | 0.77 (0.57-1.04)                        | 1.30 (0.77-2.18)        | 0.79 (0.58-1.07)         | 1.25 (0.74-2.11)        |
| Senior executive professionals              | 1                       | 1                       | 1                        | 1                       | 1                                       | 1                       | 1                        | 1                       |
| Middle executive professionals              | 0.93 (0.79-1.10)        | <b>1.47 (1.09-1.98)</b> | 0.92 (0.78-1.08)         | <b>1.44 (1.07-1.95)</b> | 1.04 (0.88-1.24)                        | <b>1.43 (1.05-1.94)</b> | 1.05 (0.88-1.24)         | <b>1.36 (1.00-1.85)</b> |
| Skilled employees                           | 0.99 (0.81-1.21)        | 1.07 (0.73-1.58)        | 0.83 (0.67-1.02)         | 0.91 (0.62-1.35)        | 0.95 (0.77-1.17)                        | 0.93 (0.62-1.39)        | 0.95 (0.77-1.17)         | 0.91 (0.61-1.35)        |

1  
2  
3  
4  
5  
6  
7  
8  
9  
10  
11  
12  
13  
14  
15  
16  
17  
18  
19  
20  
21  
22  
23  
24  
25  
26  
27  
28  
29  
30  
31  
32  
33  
34  
35  
36  
37  
38  
39  
40  
41  
42  
43  
44  
45  
46

|                                               |                         |                         |                         |                  |                         |                         |                         |                         |
|-----------------------------------------------|-------------------------|-------------------------|-------------------------|------------------|-------------------------|-------------------------|-------------------------|-------------------------|
| Low-skilled employees                         | <b>0.76 (0.64-0.91)</b> | 1.23 (0.90-1.68)        | <b>0.70 (0.59-0.84)</b> | 1.17 (0.85-1.61) | <b>0.80 (0.66-0.97)</b> | 1.09 (0.77-1.53)        | <b>0.81 (0.67-0.99)</b> | 1.00 (0.71-1.41)        |
| Skilled manual workers                        | <b>0.47 (0.35-0.62)</b> | 0.83 (0.55-1.24)        | <b>0.51 (0.39-0.67)</b> | 0.89 (0.59-1.33) | <b>0.61 (0.46-0.82)</b> | 0.85 (0.55-1.30)        | <b>0.63 (0.47-0.83)</b> | 0.79 (0.51-1.21)        |
| Low-skilled manual workers                    | <b>0.52 (0.35-0.79)</b> | 0.93 (0.57-1.54)        | <b>0.52 (0.34-0.78)</b> | 0.91 (0.55-1.51) | 0.65 (0.43-1.00)        | 0.90 (0.53-1.51)        | 0.67 (0.44-1.02)        | 0.82 (0.49-1.39)        |
| Never worked and others                       | <b>0.64 (0.54-0.77)</b> | 0.94 (0.67-1.33)        | <b>0.64 (0.53-0.78)</b> | 0.85 (0.57-1.29) | 0.81 (0.64-1.01)        | 0.85 (0.54-1.33)        | 0.81 (0.64-1.01)        | 0.80 (0.51-1.25)        |
| <b>High density of the place of residence</b> |                         |                         |                         |                  |                         |                         |                         |                         |
| No                                            | 1                       | 1                       |                         |                  | 1                       | 1                       | 1                       | 1                       |
| Yes                                           | <b>1.83 (1.64-2.05)</b> | <b>1.38 (1.14-1.68)</b> |                         |                  | 1.21 (1.06-1.38)        | 0.96 (0.77-1.21)        | <b>1.21 (1.06-1.38)</b> | 0.95 (0.76-1.20)        |
| <b>Overcrowded housing</b>                    |                         |                         |                         |                  |                         |                         |                         |                         |
| No                                            | 1                       | 1                       |                         |                  | 1                       | 1                       | 1                       | 1                       |
| Yes                                           | <b>1.38 (1.19-1.62)</b> | <b>1.74 (1.32-2.31)</b> |                         |                  | 1.03 (0.87-1.21)        | <b>1.41 (1.05-1.89)</b> | 1.04 (0.88-1.22)        | <b>1.41 (1.05-1.89)</b> |
| <b>Working arrangement during lockdown</b>    |                         |                         |                         |                  |                         |                         |                         |                         |
| Remote working only                           | 1                       | 1                       |                         |                  | 1                       | 1                       | 1                       | 1                       |
| Not working and others                        | <b>0.65 (0.56-0.76)</b> | 1.13 (0.84-1.53)        |                         |                  | 1.00 (0.82-1.21)        | <b>1.41 (1.00-1.99)</b> | 0.99 (0.82-1.21)        | 1.34 (0.95-1.88)        |
| Working outside the home partly or only       | <b>0.80 (0.69-0.92)</b> | <b>1.36 (1.03-1.81)</b> |                         |                  | <b>1.18 (1.01-1.38)</b> | <b>1.65 (1.22-2.21)</b> | <b>1.19 (1.02-1.40)</b> | <b>1.64 (1.21-2.20)</b> |

Significant associations are indicated in bold.  
a: including regions (data not shown).

For peer review only

## DISCUSSION

### Main study results

Our results are based on data documenting exposure factors and symptoms during the first epidemic wave. By distinguishing infections which probably occurred at the time of the epidemic peak (just before or in the very first days after the start of lockdown), from those which occurred later (during and early after the lockdown, as the epidemic declined), a change in the social profile of the affected people emerged. This allowed us to unmask social characteristics and exposure risk factors that increased the risk of infection during and/or after the first epidemic peak, which would have been masked by an analysis over the whole period.

Our results point that women and ethno-racial minorities were at higher risk of anosmia/ageusia during the peak and after. While senior executive professionals were more affected than lower social classes at the peak of the epidemic, this effect disappeared after.

We show that important exposure factors likely to increase contact with the virus, *i.e.* the density of the place of residence, living in overcrowded housing, and having worked outside the home during lockdown<sup>4 17</sup> have not been evenly distributed across social groups, and also that some social groups do cumulate these risk factors. Hence, racialized minorities, the least educated, and those with the lowest financial resources are particularly affected by living in densely populated communities and overcrowded housing. These data reflect the well-documented effects of socio-spatial segregation policies<sup>20</sup>. Furthermore, among those who continued to work during lockdown, working class groups have been more likely to work outside the home than senior managers who were able to work remotely, to a large extent.

### Interpretation of findings

The persistent increased risk of anosmia/ageusia among women compared to men are likely to reflect occupational specificities, beyond the categories used here. Indeed, women are

1  
2  
3 over-represented in the nursing and care assistant occupations as well as in cleaning  
4 activities<sup>22</sup>. In addition, they take care of children and the elderly<sup>23 24</sup>, which may increase their  
5 social contacts. This greater exposure of women raises questions as they are shown to be less  
6 likely to die from COVID-19 than men, which may partly reflect their lower rates of  
7 comorbidities<sup>5</sup>.

8  
9  
10  
11  
12  
13  
14  
15 With regard to ethno-racial status, the persistent higher risk of reporting anosmia/ageusia  
16 among racialized people was not linked to a lower propensity to wear a mask<sup>11</sup>. It may instead  
17 be indicative of social contacts in neighborhoods where the circulation of the virus was and  
18 remained higher over time, as suggested by our results, since their increased risk was  
19 substantially attenuated after adjusting for density of place of residence and overcrowded  
20 housing. Understanding determinants of infection among those minorities throughout the  
21 epidemic is all the more so important as a higher likelihood of dying from COVID-19 was  
22 reported in many countries, including France<sup>5 9 25</sup>.

23  
24  
25  
26  
27  
28  
29  
30  
31  
32  
33  
34  
35 Whereas senior executive professionals were more affected than lower social classes at the  
36 peak of the epidemic, this effect disappeared afterwards. Only middle executive professionals  
37 were at higher risk during the epidemic decline, which was likely due to the presence of health  
38 professionals, particularly nurses, in this group, as this association totally disappeared when  
39 further adjusted for essential occupations. The increased risk among essential occupations  
40 was particularly sharp for health professionals, due to the continuous care provided to  
41 patients with a high viral load<sup>16</sup>. It is important to note that the other so-called essential  
42 occupations were overexposed after the peak of the epidemic, this group includes those in  
43 regular contact with the public such as cashiers, bus drivers, etc. Such results call for an in-  
44 depth and longitudinal analysis of occupational disparities in COVID-19 exposure based on the  
45 combination of type of job (e.g. healthcare, high-contact jobs, etc.), working arrangement  
46  
47  
48  
49  
50  
51  
52  
53  
54  
55  
56  
57  
58  
59  
60

1  
2  
3 (remote, on-site, layoff), as well as implementation of preventive measures at the worksite.  
4  
5 Indeed, the higher risk of infection of people who worked outside the home during lockdown  
6  
7 was particularly marked after the peak of the epidemic, *i.e.* during a period of epidemic decline  
8  
9 when contact with the virus was proportionally more marked among on-site workers as  
10  
11 compared to people who stayed at home.  
12  
13

14  
15 It should also be noted that the density of the place of residence was no longer related to the  
16  
17 reporting of anosmia/ageusia occurring after the peak of the epidemic probably because the  
18  
19 virus circulates less in the neighborhood, thanks to the lockdown. On the contrary,  
20  
21 overcrowding was significantly associated after the peak only, probably due to the higher risk  
22  
23 of COVID-19 transmission linked to unavoidable close proximity and/or large number of  
24  
25 people in the household. Background rates and circulation patterns of SARS-CoV-2 should be  
26  
27 considered while looking at the social and spatial dynamics of the epidemic<sup>26</sup>, as they  
28  
29 influence the relative importance of community and workplace transmission<sup>27</sup>.  
30  
31  
32  
33

### 34 **Study limitations**

35  
36 Our analysis has nevertheless some limitations. First, as any national population-based survey,  
37  
38 the study fails to capture highly vulnerable groups such as undocumented migrants and  
39  
40 homeless people, who are particularly affected by the pandemic<sup>28</sup>.  
41  
42

43  
44 Additionally, due to a shortage of tests at the national level in the early stage of the epidemic,  
45  
46 our analyses are based on reported symptoms of anosmia/ageusia rather than on biologically  
47  
48 confirmed cases. This excludes infected people reporting other symptoms, and of course  
49  
50 asymptomatic individuals who represent one out of six of the infected population according  
51  
52 to a recent meta-analysis<sup>29</sup>.  
53  
54

55  
56 Although anosmia/ageusia reporting may be socially differentiated, especially due to  
57  
58 differences in recognition of symptoms, it is reasonable to assume that such a bias did not  
59  
60

1  
2  
3 vary during the month of the survey. One might also think that women are more likely to  
4  
5 report anosmia/ageusia since they have a heightened sense of smell compared to men, as  
6  
7 shown by sociological studies<sup>30</sup>. Nevertheless, the ratio of women to men reporting such  
8  
9 symptoms is only slightly larger than that recorded for seroprevalence in a sub-sample of the  
10  
11 same cohort<sup>31</sup> as found in other European countries<sup>32</sup>.  
12  
13

14  
15 We chose to focus on anosmia/ageusia only, which are the most specific symptoms of COVID-  
16  
17 19<sup>18 19</sup>, so that our analyses would be more robust<sup>33</sup>. Indicative of internal validity, our results  
18  
19 are consistent with epidemiological surveillance data by region<sup>34</sup> as well as with data on  
20  
21 increased risk of infection in people with chronic conditions<sup>16 35</sup>, and instead a protective  
22  
23 effect of smoking<sup>36</sup>.  
24  
25

26  
27 Finally, while it was not possible to build clear-cut periods of “likely infection” based on the  
28  
29 timing of symptoms reported by the participants, the broad distinction made between people  
30  
31 for whom symptoms started during the epidemic peak *versus* after it, allowed us to compare  
32  
33 an early stage of the epidemic with the phase of decline in the incidence corresponding to the  
34  
35 first lockdown in France.  
36  
37

## 38 39 **Conclusion**

40  
41 To our knowledge, EpiCoV is one of the first socio-epidemiological surveys conducted among  
42  
43 a very large random sample of a national population that simultaneously considers living  
44  
45 conditions and health data and allows for an intersectional analysis of social inequalities by  
46  
47 gender, ethno-racial status and social class. Our results show the importance of closely  
48  
49 monitoring social changes over time to implement prevention policies that do not contribute  
50  
51 to increasing the already significant social inequalities in health. In all, the associations  
52  
53 reported during the epidemic peak – lower exposures among low-skilled jobs than senior  
54  
55 executives, over-exposure among all ethno-racial minorities compared to the majority  
56  
57  
58  
59  
60

1  
2  
3 population, with a strong influence of overcrowding and population density – are likely to  
4  
5 reflect the social profile and associated risk factors that prevailed just before the  
6  
7 implementation of stay-at-home measures and national lockdown. By contrast, those  
8  
9 observed after the peak point to a shift in the social profile of the epidemic related to a shift  
10  
11 in exposure factors under the implementation of stringent collective prevention measures.  
12  
13 They notably stress the importance of working outside the home, all the more so in essential  
14  
15 occupations, particularly, though not exclusively, for healthcare workers<sup>37</sup>. The persistent  
16  
17 excess risk among women and some ethno-racial minorities call for further research.  
18  
19  
20  
21  
22  
23  
24  
25

## 26 **Acknowledgments**

27  
28 The authors warmly thank all the volunteers of the EpiCoV cohort.

29  
30 We thank the DREES and INSEE teams for the creation of the sample, the calculation of the  
31  
32 survey weights and the logistics of the survey.  
33  
34

35  
36 We thank the staff of the IPSOS team that have worked with dedication and engagement to  
37  
38 collect and manage the data used for this study  
39

40  
41 We thank the INSERM Santé Publique team, especially Sylvain Durrleman, and Frédéric  
42  
43 Robergeau, responsible for the management of the database.  
44  
45

## 46 **Competing interest**

47  
48 None  
49

## 50 **Funding**

51  
52  
53  
54  
55  
56 Inserm (Institut National de la Santé et de la Recherche Médicale).

57  
58 French Ministry for Research  
59  
60



1  
2  
3 Drees  
4

5 The funders facilitated data acquisition but had no role in the design, analysis, interpretation,  
6 or writing.  
7

8  
9 Dr. Bajos has received funding from the European Research Council (ERC) under the European  
10 Union's Horizon 2020 research and innovation programme (grant agreement No. [856478]).  
11  
12  
13

### 14 15 **Authors and contributors**

16 Dr. Bajos had full access to all the data in the study and takes responsibility for the integrity of  
17 the data and the accuracy of the data analysis.  
18

19  
20 *Study concept and design:* Bajos, Council, Franck  
21

22 *Data acquisition:* IPSOS.  
23

24 *Data analysis and interpretation:* Bajos, Council, Franck, Meyer, Warszawski  
25

26 *Drafting of the manuscript:* Bajos, Council, Franck  
27

28 *Critical revision of the manuscript for important intellectual content:* All authors.  
29

30 *Statistical analysis:* Franck, Khun  
31

32 *Obtained funding:* Slama  
33

34 *Administrative, technical, or material support:* Durlemand, Lydié, Rahib  
35

36 *Study supervision:* Bajos and Warszawski  
37  
38

### 39 **Data availability statement**

40 Data are available from the corresponding author on reasonable request.  
41  
42  
43  
44  
45  
46  
47  
48  
49  
50  
51  
52  
53  
54  
55  
56  
57  
58  
59  
60

## References

1. Bambra C, Riordan R, Ford J, et al. The COVID-19 pandemic and health inequalities. *J Epidemiol Community Health* 2020;74(11):964-68. doi: 10.1136/jech-2020-214401
2. Shadmi E, Chen Y, Dourado I, et al. Health equity and COVID-19: global perspectives. *Int J Equity Health* 2020;19(1):104. doi: 10.1186/s12939-020-01218-z
3. Wang Z, Tang K. Combating COVID-19: health equity matters. *Nat Med* 2020;26(4):458. doi: 10.1038/s41591-020-0823-6
4. Wachtler B, Hoebel J. [Social Inequalities and COVID-19: Social-Epidemiological Perspectives on the Pandemic]. *Gesundheitswesen* 2020;82(8-09):670-75. doi: 10.1055/a-1226-6708
5. Williamson EJ, Walker AJ, Bhaskaran K, et al. Factors associated with COVID-19-related death using OpenSAFELY. *Nature* 2020;584(7821):430-36. doi: 10.1038/s41586-020-2521-4
6. Sze S, Pan D, Nevill CR, et al. Ethnicity and clinical outcomes in COVID-19: A systematic review and meta-analysis. *EClinicalMedicine* 2020;29:100630. doi: 10.1016/j.eclinm.2020.100630
7. Meyerowitz-Katz G, Merone L. A systematic review and meta-analysis of published research data on COVID-19 infection fatality rates. *Int J Infect Dis* 2020;101:138-48. doi: 10.1016/j.ijid.2020.09.1464
8. Wright L, Steptoe A, Fancourt D. Are we all in this together? Longitudinal assessment of cumulative adversities by socioeconomic position in the first 3 weeks of lockdown in the UK. *J Epidemiol Community Health* 2020;74(9):683-88. doi: 10.1136/jech-2020-214475
9. Jefferies S, French N, Gilkison C, et al. COVID-19 in New Zealand and the impact of the national response: a descriptive epidemiological study. *Lancet Public Health* 2020;5(11):e612-e23. doi: 10.1016/S2468-2667(20)30225-5
10. Yang B, Wu P, Lau EHY, et al. Changing disparities in COVID-19 burden in the ethnically homogeneous population of Hong Kong through pandemic waves: an observational study. *Clin Infect Dis* 2021 doi: 10.1093/cid/ciab002
11. Bajos NW, J.; Pailhé, A.; Counil, E.; Jusot, F.; Spire, A.; Martin, C.; Meyer, L.; Sireyjol, A.; Franck, J.; Lydié, N.;. Les inégalités sociales au temps du COVID-19. *Questions de Santé Publique* 2020;N°40
12. Rutter PD, Mytton OT, Mak M, et al. Socio-economic disparities in mortality due to pandemic influenza in England. *Int J Public Health* 2012;57(4):745-50. doi: 10.1007/s00038-012-0337-1
13. Lowcock EC, Rosella LC, Foisy J, et al. The social determinants of health and pandemic H1N1 2009 influenza severity. *Am J Public Health* 2012;102(8):e51-8. doi: 10.2105/AJPH.2012.300814
14. Bauer GR. Incorporating intersectionality theory into population health research methodology: challenges and the potential to advance health equity. *Soc Sci Med* 2014;110:10-7. doi: 10.1016/j.socscimed.2014.03.022
15. Milner A, Jumbe S. Using the right words to address racial disparities in COVID-19. *Lancet Public Health* 2020;5(8):e419-e20. doi: 10.1016/S2468-2667(20)30162-6
16. Carrat F, Touvier M, Severi G, et al. Incidence and risk factors of COVID-19-like symptoms in the French general population during the lockdown period: a multi-cohort study. *BMC Infect Dis* 2021;21(1):169. doi: 10.1186/s12879-021-05864-8
17. Ward H, Atchison C, Whitaker M, et al. SARS-CoV-2 antibody prevalence in England following the first peak of the pandemic. *Nat Commun* 2021;12(1):905. doi: 10.1038/s41467-021-21237-w

18. Vos ERA, den Hartog G, Schepp RM, et al. Nationwide seroprevalence of SARS-CoV-2 and identification of risk factors in the general population of the Netherlands during the first epidemic wave. *J Epidemiol Community Health* 2020 doi: 10.1136/jech-2020-215678
19. Agyeman AA, Chin KL, Landersdorfer CB, et al. Smell and Taste Dysfunction in Patients With COVID-19: A Systematic Review and Meta-analysis. *Mayo Clin Proc* 2020;95(8):1621-31. doi: 10.1016/j.mayocp.2020.05.030
20. Beauchemin CH, C.; Simon, P. Trajectories and Origins: Survey on the Diversity of the French Population: Springer 2018.
21. Warszawski J, Bajos N, Barlet M, et al. A national mixed-mode seroprevalence random population-based cohort on SARS-CoV-2 epidemic in France: the socio-epidemiological EpiCov study. *medRxiv* 2021:2021.02.24.21252316. doi: 10.1101/2021.02.24.21252316
22. Argouarc'h J, Calavrezo O. La répartition des hommes et des femmes par métiers : une baisse de la ségrégation depuis 30 ans *Dares analyses* 2013;n° 79
23. Besnard XB, M.; Couvert, N.; Roy, Delphine. Les proches aidants des seniors et leur ressenti sur l'aide apportée - Résultats des enquêtes « CARE » auprès des aidants (2015-2016). *Les dossiers de la DREES* 2019;N° 45
24. Pailhé A, Solaz A, Stanfors M. The Great Convergence: Gender and Unpaid Work in Europe and the United States. *Population and Development Review* 2021;47(1):181-217. doi: <https://doi.org/10.1111/padr.12385>
25. Papon SR-BI. Une hausse des décès deux fois plus forte pour les personnes nées à l'étranger que pour celles nées en France en mars-avril 2020. *Insee Focus* 2020;No 198
26. Jay J, Bor J, Nsoesie EO, et al. Neighbourhood income and physical distancing during the COVID-19 pandemic in the United States. *Nat Hum Behav* 2020;4(12):1294-302. doi: 10.1038/s41562-020-00998-2
27. Ossimetha A, Ossimetha A, Kosar CM, et al. Socioeconomic Disparities in Community Mobility Reduction and COVID-19 Growth. *Mayo Clin Proc* 2021;96(1):78-85. doi: 10.1016/j.mayocp.2020.10.019
28. Tsai J, Wilson M. COVID-19: a potential public health problem for homeless populations. *Lancet Public Health* 2020;5(4):e186-e87. doi: 10.1016/S2468-2667(20)30053-0
29. Byambasuren OC, M.; Bell, K.; Clark, J.; McLaws, M.-L.; Glasziou, P. Estimating the extent of asymptomatic COVID-19 and its potential for community transmission: Systematic review and meta-analysis. *Off J Assoc Med Microbiol Infect Dis Can* 2020(5):223-34.
30. Sorokowski P, Karwowski M, Misiak M, et al. Sex Differences in Human Olfaction: A Meta-Analysis. *Front Psychol* 2019;10:242. doi: 10.3389/fpsyg.2019.00242
31. Warszawski Jea. In May 2020, 4.5% of the population of metropolitan France had developed antibodies against SARS-CoV-2. The first results of the EpiCov national survey. *Etudes et Résultats* 2020;N°1167
32. Lechien JR, Chiesa-Estomba CM, De Siaty DR, et al. Olfactory and gustatory dysfunctions as a clinical presentation of mild-to-moderate forms of the coronavirus disease (COVID-19): a multicenter European study. *Eur Arch Otorhinolaryngol* 2020;277(8):2251-61. doi: 10.1007/s00405-020-05965-1
33. Rothman KG, S. *Modern Epidemiology*, 2nd Edition.: Lippincott Williams & Wilkins. 1998.
34. [Available from: <https://www.data.gouv.fr/fr/datasets/indicateurs-de-suivi-de-lepidemie-de-covid-19/> accessed April 2021.

- 1  
2  
3 35. Halpin DMG, Faner R, Sibila O, et al. Do chronic respiratory diseases or their treatment  
4 affect the risk of SARS-CoV-2 infection? *Lancet Respir Med* 2020;8(5):436-38. doi:  
5 10.1016/S2213-2600(20)30167-3  
6  
7 36. Zhao Q, Meng M, Kumar R, et al. The impact of COPD and smoking history on the severity  
8 of COVID-19: A systemic review and meta-analysis. *J Med Virol* 2020;92(10):1915-  
9 21. doi: 10.1002/jmv.25889  
10  
11 37. Fisher KA, Olson SM, Tenforde MW, et al. Telework Before Illness Onset Among  
12 Symptomatic Adults Aged  $\geq 18$  Years With and Without COVID-19 in 11 Outpatient  
13 Health Care Facilities - United States, July 2020. *MMWR Morb Mortal Wkly Rep*  
14 2020;69(44):1648-53. doi: 10.15585/mmwr.mm6944a4  
15  
16  
17  
18  
19  
20  
21  
22  
23  
24  
25  
26  
27  
28  
29  
30  
31  
32  
33  
34  
35  
36  
37  
38  
39  
40  
41  
42  
43  
44  
45  
46  
47  
48  
49  
50  
51  
52  
53  
54  
55  
56  
57  
58  
59  
60

For peer review only

## Supplementary Table 1

Factors associated with anosmia/ageusia during or after the epidemic peak (as compared to no reported anosmia/ageusia starting after lockdown). Multinomial logistic regressions.

|                                               | Crude model                        |                                   | Full adjusted model                |                                   |
|-----------------------------------------------|------------------------------------|-----------------------------------|------------------------------------|-----------------------------------|
|                                               | <i>During peak<br/>OR (95% CI)</i> | <i>After peak<br/>OR (95% CI)</i> | <i>During peak<br/>OR (95% CI)</i> | <i>After peak<br/>OR (95% CI)</i> |
| <b>Age</b>                                    |                                    |                                   |                                    |                                   |
| 18-24                                         | 1                                  | 1                                 | 1                                  | 1                                 |
| 25-34                                         | <b>1.68 (1.36-2.07)</b>            | 1.18 (0.87-1.60)                  | <b>1.51 (1.20-1.91)</b>            | 0.93 (0.65-1.33)                  |
| 35-44                                         | <b>1.56 (1.27-1.91)</b>            | 1.22 (0.91-1.65)                  | <b>1.39 (1.11-1.74)</b>            | 0.90 (0.64-1.27)                  |
| 45-54                                         | <b>1.43 (1.17-1.74)</b>            | 0.86 (0.63-1.18)                  | <b>1.34 (1.07-1.67)</b>            | <b>0.64 (0.44-0.91)</b>           |
| 55-64                                         | 0.89 (0.71-1.11)                   | 0.76 (0.54-1.06)                  | 0.92 (0.72-1.18)                   | <b>0.59 (0.38-0.91)</b>           |
| <b>Sex</b>                                    |                                    |                                   |                                    |                                   |
| Men                                           | 1                                  | 1                                 | 1                                  | 1                                 |
| Women                                         | <b>1.57 (1.40-1.76)</b>            | <b>1.40 (1.14-1.71)</b>           | <b>1.48 (1.31-1.68)</b>            | <b>1.27 (1.02-1.59)</b>           |
| <b>Ethno-racial status</b>                    |                                    |                                   |                                    |                                   |
| Mainstream population                         | 1                                  | 1                                 | 1                                  | 1                                 |
| Non-racialized first-generation immigrants    | <b>1.52 (1.16-2.00)</b>            | <b>2.00 (1.14-3.53)</b>           | 1.27 (0.97-1.68)                   | <b>1.85 (1.09-3.17)</b>           |
| Non-racialized second-generation immigrants   | <b>1.40 (1.07-1.82)</b>            | 1.16 (0.77-1.76)                  | 1.26 (0.97-1.64)                   | 1.08 (0.72-1.64)                  |
| Racialized first-generation immigrants        | <b>1.46 (1.18-1.80)</b>            | 1.20 (0.82-1.75)                  | 1.09 (0.87-1.36)                   | 0.96 (0.65-1.43)                  |
| Racialized second generation immigrants       | <b>2.01 (1.63-2.48)</b>            | <b>1.87 (1.34-2.63)</b>           | <b>1.44 (1.16-1.79)</b>            | <b>1.42 (1.00-2.01)</b>           |
| DOM or descendants of DOM native              | <b>2.01 (1.43-2.81)</b>            | <b>2.02 (1.21-3.36)</b>           | <b>1.50 (1.06-2.11)</b>            | 1.44 (0.85-2.42)                  |
| <b>Social class</b>                           |                                    |                                   |                                    |                                   |
| Self-employed and entrepreneurs               | <b>0.62 (0.47-0.83)</b>            | 1.30 (0.77-2.19)                  | 0.80 (0.59-1.09)                   | 1.44 (0.84-2.45)                  |
| Senior executive professionals                | 1                                  | 1                                 | 1                                  | 1                                 |
| Middle executive professionals                | 0.93 (0.79-1.10)                   | <b>1.47 (1.09-1.98)</b>           | 1.02 (0.86-1.21)                   | 1.18 (0.86-1.61)                  |
| Skilled employees                             | 0.99 (0.81-1.21)                   | 1.07 (0.73-1.58)                  | 0.96 (0.78-1.19)                   | 0.93 (0.62-1.39)                  |
| Low-skilled employees                         | <b>0.76 (0.64-0.91)</b>            | 1.23 (0.90-1.68)                  | 0.82 (0.67-1.00)                   | 1.05 (0.74-1.49)                  |
| Skilled manual workers                        | <b>0.47 (0.35-0.62)</b>            | 0.83 (0.55-1.24)                  | <b>0.64 (0.48-0.85)</b>            | 0.84 (0.54-1.31)                  |
| Low-skilled manual workers                    | <b>0.52 (0.35-0.79)</b>            | 0.93 (0.57-1.54)                  | 0.68 (0.44-1.04)                   | 0.92 (0.54-1.56)                  |
| Never worked and others                       | <b>0.64 (0.54-0.77)</b>            | 0.94 (0.67-1.33)                  | 0.81 (0.65-1.02)                   | 0.89 (0.56-1.41)                  |
| <b>High density of the place of residence</b> |                                    |                                   |                                    |                                   |
| No                                            | 1                                  | 1                                 | 1                                  | 1                                 |
| Yes                                           | <b>1.83 (1.64-2.05)</b>            | <b>1.38 (1.14-1.68)</b>           | <b>1.24 (1.08-1.41)</b>            | 0.97 (0.77-1.23)                  |
| <b>Overcrowded housing</b>                    |                                    |                                   |                                    |                                   |
| No                                            | 1                                  | 1                                 | 1                                  | 1                                 |
| Yes                                           | <b>1.38 (1.19-1.62)</b>            | <b>1.74 (1.32-2.31)</b>           | 0.92 (0.77-1.10)                   | <b>1.35 (0.96-1.90)</b>           |
| <b>Working arrangement during lockdown</b>    |                                    |                                   |                                    |                                   |
| Remote working only                           | 1                                  | 1                                 | 1                                  | 1                                 |
| Not working and others                        | <b>0.65 (0.56-0.76)</b>            | 1.13 (0.84-1.53)                  | 0.99 (0.81-1.22)                   | 1.38 (0.96-1.99)                  |
| Working outside the home partly or only       | <b>0.80 (0.69-0.92)</b>            | <b>1.36 (1.03-1.81)</b>           | 1.14 (0.96-1.34)                   | 1.25 (0.92-1.70)                  |
| <b>Smoking</b>                                |                                    |                                   |                                    |                                   |
| Daily                                         | 1                                  | 1                                 | 1                                  | 1                                 |
| Occasionally                                  | <b>1.63 (1.25-2.13)</b>            | 1.13 (0.74-1.73)                  | <b>1.50 (1.14-1.96)</b>            | 1.10 (0.72-1.70)                  |
| No longer                                     | <b>1.40 (1.18-1.67)</b>            | 0.90 (0.69-1.17)                  | <b>1.39 (1.16-1.66)</b>            | 0.91 (0.69-1.19)                  |

|                                              |                         |                         |                         |                         |
|----------------------------------------------|-------------------------|-------------------------|-------------------------|-------------------------|
| No                                           | <b>1.28 (1.09-1.51)</b> | 0.82 (0.64-1.06)        | 1.11 (0.94-1.32)        | <b>0.74 (0.57-0.95)</b> |
| <b>Chronic disease</b>                       |                         |                         |                         |                         |
| No                                           | 1                       | 1                       | 1                       | 1                       |
| Kidney disease                               | 1.00 (0.46-2.17)        | <b>3.19 (1.11-9.15)</b> | 1.21 (0.55-2.63)        | <b>3.95 (1.36-11.5)</b> |
| Other disease                                | 1.09 (0.96-1.23)        | <b>1.52 (1.23-1.88)</b> | <b>1.19 (1.04-1.36)</b> | <b>1.68 (1.37-2.07)</b> |
| <b>Body mass index</b>                       |                         |                         |                         |                         |
| Normal                                       | 1                       | 1                       | 1                       | 1                       |
| Underweight                                  | 0.96 (0.72-1.28)        | 0.98 (0.60-1.59)        | 1.00 (0.75-1.34)        | 0.94 (0.57-1.53)        |
| Overweight                                   | 0.86 (0.75-0.98)        | 1.08 (0.86-1.34)        | 0.90 (0.79-1.03)        | 1.11 (0.88-1.40)        |
| Obese                                        | 1.06 (0.89-1.25)        | <b>1.44 (1.09-1.91)</b> | 1.06 (0.89-1.27)        | <b>1.38 (1.04-1.84)</b> |
| <b>Number of persons living in the house</b> |                         |                         |                         |                         |
| 1                                            | 1                       | 1                       | 1                       | 1                       |
| 2                                            | 0.92 (0.75-1.14)        | 1.05 (0.73-1.52)        | 0.99 (0.80-1.22)        | 1.07 (0.74-1.56)        |
| 3 or 4                                       | 1.15 (0.95-1.39)        | 1.35 (0.96-1.91)        | 1.14 (0.93-1.39)        | 1.26 (0.88-1.79)        |
| 5 or more                                    | <b>1.45 (1.17-1.80)</b> | 1.50 (1.01-2.21)        | <b>1.42 (1.12-1.81)</b> | 1.20 (0.77-1.87)        |
| <b>Essential occupations</b>                 |                         |                         |                         |                         |
| No                                           | 1                       | 1                       | 1                       | 1                       |
| Healthcare workers                           | <b>1.72 (1.41-2.10)</b> | <b>3.49 (2.59-4.70)</b> | <b>1.32 (1.05-1.66)</b> | <b>3.46 (2.43-4.93)</b> |
| Others                                       | 1.13 (1.00-1.28)        | <b>1.26 (1.02-1.57)</b> | 1.05 (0.90-1.22)        | <b>1.35 (1.04-1.74)</b> |
| <b>Region</b>                                |                         |                         |                         |                         |
| Least affected regions                       | 1                       | 1                       | 1                       | 1                       |
| Grand Est                                    | <b>2.37 (2.01-2.79)</b> | <b>1.43 (1.05-1.95)</b> | <b>2.40 (2.03-2.84)</b> | <b>1.44 (1.06-1.96)</b> |
| Hauts de France                              | <b>1.41 (1.14-1.73)</b> | <b>1.55 (1.15-2.10)</b> | <b>1.43 (1.16-1.76)</b> | <b>1.53 (1.13-2.08)</b> |
| Ile-de-France                                | <b>3.01 (2.64-3.43)</b> | <b>2.26 (1.79-2.84)</b> | <b>2.47 (2.13-2.86)</b> | <b>2.21 (1.71-2.84)</b> |

Significant associations are indicated in bold.

STROBE Statement—Checklist of items that should be included in reports of *cohort studies*

|                              | Item No | Recommendation                                                                                                                                                                                                                                                                                                         | Page No |
|------------------------------|---------|------------------------------------------------------------------------------------------------------------------------------------------------------------------------------------------------------------------------------------------------------------------------------------------------------------------------|---------|
| <b>Title and abstract</b>    | 1       | (a) Indicate the study's design with a commonly used term in the title or the abstract<br>(b) Provide in the abstract an informative and balanced summary of what was done and what was found                                                                                                                          | 1-2     |
| <b>Introduction</b>          |         |                                                                                                                                                                                                                                                                                                                        |         |
| Background/rationale         | 2       | Explain the scientific background and rationale for the investigation being reported                                                                                                                                                                                                                                   | 4       |
| Objectives                   | 3       | State specific objectives, including any prespecified hypotheses                                                                                                                                                                                                                                                       | 5       |
| <b>Methods</b>               |         |                                                                                                                                                                                                                                                                                                                        |         |
| Study design                 | 4       | Present key elements of study design early in the paper                                                                                                                                                                                                                                                                | 5       |
| Setting                      | 5       | Describe the setting, locations, and relevant dates, including periods of recruitment, exposure, follow-up, and data collection                                                                                                                                                                                        | 5       |
| Participants                 | 6       | (a) Give the eligibility criteria, and the sources and methods of selection of participants. Describe methods of follow-up<br>(b) For matched studies, give matching criteria and number of exposed and unexposed                                                                                                      | 5       |
| Variables                    | 7       | Clearly define all outcomes, exposures, predictors, potential confounders, and effect modifiers. Give diagnostic criteria, if applicable                                                                                                                                                                               | 6-8     |
| Data sources/<br>measurement | 8*      | For each variable of interest, give sources of data and details of methods of assessment (measurement). Describe comparability of assessment methods if there is more than one group                                                                                                                                   | 6-8     |
| Bias                         | 9       | Describe any efforts to address potential sources of bias                                                                                                                                                                                                                                                              | 8       |
| Study size                   | 10      | Explain how the study size was arrived at                                                                                                                                                                                                                                                                              | 8       |
| Quantitative variables       | 11      | Explain how quantitative variables were handled in the analyses. If applicable, describe which groupings were chosen and why                                                                                                                                                                                           | NA      |
| Statistical methods          | 12      | (a) Describe all statistical methods, including those used to control for confounding<br>(b) Describe any methods used to examine subgroups and interactions<br>(c) Explain how missing data were addressed<br>(d) If applicable, explain how loss to follow-up was addressed<br>(e) Describe any sensitivity analyses | 8       |
| <b>Results</b>               |         |                                                                                                                                                                                                                                                                                                                        |         |
| Participants                 | 13*     | (a) Report numbers of individuals at each stage of study—eg numbers potentially eligible, examined for eligibility, confirmed eligible, included in the study, completing follow-up, and analysed<br>(b) Give reasons for non-participation at each stage<br>(c) Consider use of a flow diagram                        | 8       |
| Descriptive data             | 14*     | (a) Give characteristics of study participants (eg demographic, clinical, social) and information on exposures and potential confounders<br>(b) Indicate number of participants with missing data for each variable of interest<br>(c) Summarise follow-up time (eg, average and total amount)                         | 8-10    |
| Outcome data                 | 15*     | Report numbers of outcome events or summary measures over time                                                                                                                                                                                                                                                         | 8-10    |

|    |                          |                                                                                                                  |                                                                                                                                                                                                              |       |
|----|--------------------------|------------------------------------------------------------------------------------------------------------------|--------------------------------------------------------------------------------------------------------------------------------------------------------------------------------------------------------------|-------|
| 1  | Main results             | 16                                                                                                               | (a) Give unadjusted estimates and, if applicable, confounder-adjusted estimates and their precision (eg, 95% confidence interval). Make clear which confounders were adjusted for and why they were included | 8-16  |
| 2  |                          | (b) Report category boundaries when continuous variables were categorized                                        |                                                                                                                                                                                                              |       |
| 3  |                          | (c) If relevant, consider translating estimates of relative risk into absolute risk for a meaningful time period |                                                                                                                                                                                                              |       |
| 4  | Other analyses           | 17                                                                                                               | Report other analyses done—eg analyses of subgroups and interactions, and sensitivity analyses                                                                                                               | 8-16  |
| 5  | <b>Discussion</b>        |                                                                                                                  |                                                                                                                                                                                                              |       |
| 6  | Key results              | 18                                                                                                               | Summarise key results with reference to study objectives                                                                                                                                                     | 17    |
| 7  | Limitations              | 19                                                                                                               | Discuss limitations of the study, taking into account sources of potential bias or imprecision. Discuss both direction and magnitude of any potential bias                                                   | 19    |
| 8  | Interpretation           | 20                                                                                                               | Give a cautious overall interpretation of results considering objectives, limitations, multiplicity of analyses, results from similar studies, and other relevant evidence                                   | 17-19 |
| 9  | Generalisability         | 21                                                                                                               | Discuss the generalisability (external validity) of the study results                                                                                                                                        | 20    |
| 10 | <b>Other information</b> |                                                                                                                  |                                                                                                                                                                                                              |       |
| 11 | Funding                  | 22                                                                                                               | Give the source of funding and the role of the funders for the present study and, if applicable, for the original study on which the present article is based                                                | 21    |

\*Give information separately for exposed and unexposed groups.

**Note:** An Explanation and Elaboration article discusses each checklist item and gives methodological background and published examples of transparent reporting. The STROBE checklist is best used in conjunction with this article (freely available on the Web sites of PLoS Medicine at <http://www.plosmedicine.org/>, Annals of Internal Medicine at <http://www.annals.org/>, and Epidemiology at <http://www.epidem.com/>). Information on the STROBE Initiative is available at <http://www.strobe-statement.org>.



# BMJ Open

## Social Inequalities and Dynamics of the early COVID-19 Epidemic: a prospective cohort study in France.

|                                 |                                                                                                                                                                                                                                                                                                                                                                                                                                                                                                                                                                                                                              |
|---------------------------------|------------------------------------------------------------------------------------------------------------------------------------------------------------------------------------------------------------------------------------------------------------------------------------------------------------------------------------------------------------------------------------------------------------------------------------------------------------------------------------------------------------------------------------------------------------------------------------------------------------------------------|
| Journal:                        | <i>BMJ Open</i>                                                                                                                                                                                                                                                                                                                                                                                                                                                                                                                                                                                                              |
| Manuscript ID                   | bmjopen-2021-052888.R1                                                                                                                                                                                                                                                                                                                                                                                                                                                                                                                                                                                                       |
| Article Type:                   | Original research                                                                                                                                                                                                                                                                                                                                                                                                                                                                                                                                                                                                            |
| Date Submitted by the Author:   | 26-Aug-2021                                                                                                                                                                                                                                                                                                                                                                                                                                                                                                                                                                                                                  |
| Complete List of Authors:       | Bajos, Nathalie; Institut de recherche interdisciplinaire sur les enjeux sociaux; INSERM<br>Counil, Emilie; INED<br>Franck, Jeanna-eve; Institut de recherche interdisciplinaire sur les enjeux sociaux; INSERM<br>Jusot, Florence; Université Paris Dauphine<br>Pailhé, Ariane; INED<br>Spire, Alexis; Institut de recherche interdisciplinaire sur les enjeux sociaux; INSERM<br>Martin, Claude; CNRS, UMR 6051; EHESP<br>Lydie, Nathalie; Santé publique France<br>Slama, Remy; Université Grenoble Alpes; INSERM<br>Meyer, Laurence; CESP; Université Paris-Saclay<br>Warszawski, Josiane; CESP; Université Paris-Saclay |
| <b>Primary Subject Heading</b>: | Epidemiology                                                                                                                                                                                                                                                                                                                                                                                                                                                                                                                                                                                                                 |
| Secondary Subject Heading:      | Public health                                                                                                                                                                                                                                                                                                                                                                                                                                                                                                                                                                                                                |
| Keywords:                       | COVID-19, Public health < INFECTIOUS DISEASES, SOCIAL MEDICINE                                                                                                                                                                                                                                                                                                                                                                                                                                                                                                                                                               |
|                                 |                                                                                                                                                                                                                                                                                                                                                                                                                                                                                                                                                                                                                              |

SCHOLARONE™  
Manuscripts



I, the Submitting Author has the right to grant and does grant on behalf of all authors of the Work (as defined in the below author licence), an exclusive licence and/or a non-exclusive licence for contributions from authors who are: i) UK Crown employees; ii) where BMJ has agreed a CC-BY licence shall apply, and/or iii) in accordance with the terms applicable for US Federal Government officers or employees acting as part of their official duties; on a worldwide, perpetual, irrevocable, royalty-free basis to BMJ Publishing Group Ltd ("BMJ") its licensees and where the relevant Journal is co-owned by BMJ to the co-owners of the Journal, to publish the Work in this journal and any other BMJ products and to exploit all rights, as set out in our [licence](#).

The Submitting Author accepts and understands that any supply made under these terms is made by BMJ to the Submitting Author unless you are acting as an employee on behalf of your employer or a postgraduate student of an affiliated institution which is paying any applicable article publishing charge ("APC") for Open Access articles. Where the Submitting Author wishes to make the Work available on an Open Access basis (and intends to pay the relevant APC), the terms of reuse of such Open Access shall be governed by a Creative Commons licence – details of these licences and which [Creative Commons](#) licence will apply to this Work are set out in our licence referred to above.

Other than as permitted in any relevant BMJ Author's Self Archiving Policies, I confirm this Work has not been accepted for publication elsewhere, is not being considered for publication elsewhere and does not duplicate material already published. I confirm all authors consent to publication of this Work and authorise the granting of this licence.

1  
2  
3 Title: Social Inequalities and Dynamics of the early COVID-19 Epidemic: a prospective cohort  
4 study in France  
5  
6  
7

### 8 Authors

9  
10 Nathalie Bajos, PhD<sup>1</sup>, Emilie Council\*, PhD<sup>2</sup>, Jeanna-Eve Franck\*, PhD<sup>3</sup>, Florence Jusot<sup>3</sup>, Ariane  
11 Pailhé, PhD<sup>2</sup>, Alexis Spire, PhD<sup>1</sup>, Claude Martin, PhD<sup>4</sup>, Nathalie Lydié, PhD<sup>5</sup>, Rémy Slama<sup>6</sup>,  
12 PhD, Laurence Meyer, PhD<sup>7</sup>, Josiane Warszawski, PhD<sup>7</sup>; for the EpiCoV study group\*\*  
13  
14  
15

### 16 Affiliations

17  
18  
19 <sup>1</sup> IRIS, Inserm/EHESS/CNRS, Aubervilliers, France.

20  
21 <sup>2</sup> Ined, Aubervilliers, France.

22  
23 <sup>3</sup> Université Paris Dauphine, Paris, France.

24  
25 <sup>4</sup> ARENES UMR 6051, CNRS, EHESP, Rennes, France.

26  
27 <sup>5</sup> Santé publique France, Saint-Maurice, France.

28  
29 <sup>6</sup> University Grenoble Alpes, Inserm, CNRS, Institute for Advanced Biosciences, Grenoble,  
30 France.

31  
32 <sup>7</sup> CESP UMR 1018, Université Paris-Saclay, APHP, le Kremlin-Bicêtre, France.  
33  
34

35 **\*These authors contributed equally to this work**

### 36 **\*\*The EpiCoV study group**

37  
38 EpiCoV study group: Nathalie Bajos (co-principal investigator), Josiane Warszawski (co-  
39 principal investigator), Guillaume Bagein, Muriel Barlet, François Beck, Emilie Council, Florence  
40 Jusot, Aude Leduc, Nathalie Lydie, Claude Martin, Laurence Meyer, Ariane Pailhé, Nicolas  
41 Palioud, Delphine Rahib, Philippe Raynaud, Alexandra Rouquette, Patrick Sicard, Rémy Slama,  
42 Alexis Spire.  
43  
44

### 45 Correspondence to

46  
47  
48 Dr Nathalie Bajos, Institut de Recherche Interdisciplinaire sur les enjeux Sociaux - Sciences  
49 sociales, politique, santé, IRIS (UMR 8156 CNRS - EHESS - U997 Inserm) 5 cours des  
50 humanités, 93322 Aubervilliers cedex, France.

51 Tel: +33 (0)6 66 32 30 00. nathalie.bajos@inserm.fr  
52  
53

### 54 Word count

55  
56 Abstract (286), text (3,072), references (37)  
57  
58  
59  
60

**ABSTRACT**

**Objective** Although social inequalities in COVID-19 mortality by race, gender and socioeconomic status are well documented, less is known about social disparities in infection rates and their shift over time. We aim to study the evolution of social disparities in infection at the early stage of the epidemic in France with regard to the policies implemented.

**Design** Random population-based prospective cohort.

**Setting** From May to June 2020 in France.

**Participants** Adults included in the EpiCoV cohort (n=77,588).

**Main outcome measures** Self-reported anosmia and/or ageusia in three categories: no symptom, during the first epidemic peak (in March 2020) or thereafter (during lockdown).

**Results** In all, 2,045 participants (1.53%) reported anosmia/ageusia. The social distribution of exposure factors (density of place of residence, overcrowded housing and working outside the home) was described. Multinomial regressions were used to identify changes in social variables (gender, class and race) associated with symptoms of anosmia/ageusia. Women were more likely to report symptoms during the peak and after. Racialized minorities accumulated more exposure risk factors than the mainstream population and were at higher risk of anosmia/ageusia during the peak and after. By contrast, senior executive professionals were the least exposed to the virus with the lower rate of working outside the home during lockdown. They were more affected than lower social classes at the peak of the epidemic, but this effect disappeared after the peak.

**Conclusion** The shift in the social profile of the epidemic was related to a shift in exposure factors under the implementation of a stringent stay-at-home order. Our study shows the importance to consider in a dynamic way the gender, socioeconomic and race direct and indirect effects of the COVID-19 pandemic, notably to implement policies that do not widen health inequalities.

**Keywords:** COVID-19; Social inequalities; Gender; Social class; Race

## ARTICLE SUMMARY

### Strengths and limitations of the study

- EpiCoV is a large random socio-epidemiological prospective cohort including both detailed social characteristics, exposure risk factors and date of first COVID-19-Like symptom(s), enabling us to study the dynamic of the pandemic social profile.
- We focused on the most specific symptoms of SARS-CoV2 infection - anosmia/ageusia - which makes our analyses more robust.
- Our outcome is based on reported symptoms rather than on biologically confirmed cases due to the lack of tests at the time of the survey.
- Highly vulnerable populations, such as homeless people, are not represented in our sample.

## INTRODUCTION

The COVID-19 pandemic that has been hitting the world since the beginning of the year 2020 has reinforced and strengthened social inequalities in health<sup>1-3</sup>. This evidence mostly comes from mortality-based studies<sup>4 5</sup>. Few studies are based on the incidence of COVID-19<sup>6</sup>, while the disease has an infection case-fatality ratio below 1%<sup>7</sup>. Most of these analyses are from the USA and the UK, which have strong specificities in terms of healthcare systems and social and ethnic inequalities. They are based on ecological studies, not allowing to consider socioeconomic inequalities at the individual level and to adjust for potential confounders<sup>4</sup>. In addition, the literature very little addressed the dynamics of social inequalities as the epidemic evolves and prevention measures are implemented, measures that may themselves have differential efficiency across social and ethnic groups and between sexes. Notable exceptions are Wright et al<sup>8</sup> (in the United Kingdom) and Jefferies et al<sup>9</sup> (in New-Zealand), who found trends towards lower risk of suspected COVID-19 and lower testing rates of SARS-CoV-2 among people of lower socioeconomic status during the early weeks of the epidemic and a higher risk and higher testing rates subsequently.

Few studies showed that the prevention policies put in place, in particular the mobility restrictions and the strong incentive to work remotely, were more beneficial to the most privileged classes in terms of disease incidence<sup>10 11</sup>. This suggests that the social distribution of exposure factors may have changed over time, as has been previously found for other influenza pandemics<sup>12 13</sup>.

Our objective was to study the dynamics of gender, race and social class-related inequalities in COVID-19 disease incidence at the early stage of the epidemic in France. We adopted an intersectional approach<sup>14</sup> that simultaneously takes into account these three social factors<sup>15</sup>.

1  
2  
3 We first compared the occurrence of reported anosmia and/or ageusia - a specific proxy of  
4 disease incidence - by socio-demographic characteristics between the first peak of the  
5 epidemic, around March 19<sup>th</sup>, until the beginning of June 2020, when the incidence decreased  
6 following the first lockdown<sup>16</sup>. Then we studied how the distribution of three important risk  
7 factors of COVID-19 exposure and infection, *i.e.* population density, overcrowded housing and  
8 working outside the home<sup>17</sup>, varied across socio-demographic groups. Finally, we studied how  
9 the association of social characteristics with anosmia/ageusia evolved during and after the  
10 epidemic peak while adjusting for exposure risk factors and health variables.  
11  
12  
13  
14  
15  
16  
17  
18  
19  
20  
21  
22  
23

## 24 **PARTICIPANTS AND METHODS**

### 25 **Study design and participants**

26  
27 The EpiCoV (Epidémiologie et Conditions de Vie) cohort was set-up in April 2020, with the  
28 general aim of understanding the main epidemiological, social and behavioral features of the  
29 COVID-19 epidemic in France. The data collection period ran from May 2<sup>nd</sup> to June 2<sup>nd</sup>, 2020.  
30  
31 In France, strict lockdown expanded from March the 17<sup>th</sup> to May the 10<sup>th</sup> and the first  
32 epidemic peak was recorded around March 19<sup>th</sup><sup>16</sup>.  
33  
34  
35  
36  
37  
38  
39

40 A stratified random sample of 350,000 people aged 15 and over was drawn from the tax  
41 database of the National Institute of Statistics and Economic Studies (INSEE), which covers  
42 96% of the population living in France, but excludes people living in institutional settings.  
43  
44 People belonging to the lowest decile of income were over-represented. A total of 134,391  
45 (38.4%) participated in the survey. Individuals were invited to answer the questionnaire  
46 online, or by phone if they did not have Internet access.  
47  
48  
49  
50  
51  
52  
53  
54

55 We used reweighting and marginal calibrations in the survey and sampling design to correct  
56 for non-participation bias. We focused on people living in metropolitan France, aged 18-64  
57  
58  
59  
60

1  
2  
3 years, in order to take into account working arrangements and type of occupation in the  
4  
5 analysis (n=98,787).  
6

### 7 8 **Ethical statement**

9  
10 The survey was approved by the CNIL (French independent administrative authority  
11 responsible for data protection) on April 25<sup>th</sup> 2020 (ref: MLD/MFI/AR205138) and by the  
12  
13 “Comité de protection des personnes” (French equivalent of the Research Ethics Committee)  
14  
15 on April 24<sup>th</sup>. The survey also obtained an agreement from the “Comité du Label de la  
16  
17 statistique publique”, proving its adequacy to statistical quality standards.  
18  
19  
20  
21

### 22 23 **Patient and public involvement**

24  
25 Patients and/or the public were not involved in the design, or conduct, or reporting, or  
26  
27 dissemination plans of this research.  
28

### 29 30 **Outcome**

31  
32 Participants were invited to report COVID-19-Like symptoms (such as cough, fever, dyspnea,  
33  
34 anosmia and/or ageusia), if they were unusual and if they were present at or occurred since  
35  
36 the beginning of the lockdown. They also reported when the first symptom appeared. The  
37  
38 main health outcome studied here was reporting symptoms of anosmia and/or ageusia, the  
39  
40 most specific symptoms of SARS-CoV2 infection<sup>18 19 17</sup>. Among those who did not report  
41  
42 anosmia/ageusia, the analysis was restricted to people without reported cough, fever or  
43  
44 dyspnea in order to exclude possible COVID-19 cases (n=14,080). Individuals whose symptoms  
45  
46 started before lockdown were also not considered in the analysis to avoid overrepresentation  
47  
48 of long-lasting forms of COVID-19 (n=844).  
49  
50  
51  
52

53  
54 A distinction was made between those people whose first symptoms began more than one  
55  
56 month before their response to the survey, likely to have occurred *during* the epidemic peak,  
57  
58 and those whose first symptoms began less than one month before, likely to have occurred  
59  
60



1  
2  
3 *after* the peak, during the epidemic decline phase (during and early after lockdown). Our  
4  
5 outcome was in three categories: no reported anosmia/ageusia (nor cough, fever or dyspnea),  
6  
7 anosmia/ageusia starting during the epidemic peak, anosmia/ageusia starting after the  
8  
9 epidemic peak.  
10  
11

### 12 **Socio-demographic variables**

13  
14 We considered the following six variables: age, sex, ethno-racial status (based on migration  
15  
16 history), social class (based on current or most recent occupation combined with education),  
17  
18 standard of living (based on decile of income per household consumption unit) and formal  
19  
20 education (defined according to the hierarchical grid of diplomas in France). The ethno-racial  
21  
22 status distinguished mainstream population, *i.e.* persons residing in metropolitan France who  
23  
24 are neither immigrants nor native to French Overseas Departments (DOM, *i.e.* Martinique,  
25  
26 Guadeloupe, Reunion Island), nor descendants of immigrant(s) or of DOM native<sup>20</sup>. For the  
27  
28 minority population, a distinction was made according to the first (immigrants) and second  
29  
30 (descendants of immigrants) generations of immigration, and the country of origin. The term  
31  
32 racialized refers to people from the Maghreb, Turkey, Asia and Africa.  
33  
34  
35  
36  
37  
38  
39

### 40 **Exposure risk factors**

41  
42 We considered three main risk factors of exposure to COVID-19: having worked outside the  
43  
44 home during lockdown (at least partly), high density of the place of residence (*i.e.* at least  
45  
46 1,500 inhabitants per km<sup>2</sup> and a minimum of 50,000 inhabitants) and overcrowded housing  
47  
48 (*i.e.* at least two persons living in housing with less than 18m<sup>2</sup> per person) both assessed using  
49  
50 the official national definitions. Additional explanatory variables included self-reported  
51  
52 essential occupations and household size. To account for regional variations in incidence, we  
53  
54 distinguished between the least affected and the three most affected regions at the time of  
55  
56 the survey.  
57  
58  
59  
60

## Health variables

Health variables included smoking habits, self-reported history of chronic diseases and body mass index.

## Statistical analyses

We first studied the association between the three social variables of interest (gender, race, social class) and anosmia/ageusia, distinguishing between the two periods, and then with the exposure risk factors (density, overcrowding and working outside) using Chi2-test. To study how the social characteristics associated with anosmia/ageusia evolved during and after the epidemic peak, we further developed a step by step multinomial analysis adjusted for (i) age and social variables (M0), (ii) then adding the three main exposure variables and regions (M1), (iii) and finally adding health variables (M2).

Observations with missing values on anosmia/ageusia or main social and exposure variables were excluded from our analysis (n=6275, 7.5%). In all, 77,588 individuals were included in our analyses. All analyses were weighted using a Heckman model to take into account the effect of the response mode on the reporting of COVID-19-Like symptoms<sup>21</sup>. Analyses were performed with the SAS software 9.4. A P-value <0.05 was considered statistically significant.

## RESULTS

### *Gendered differences*

Women were more likely to have been affected by anosmia/ageusia: 1.84% of women versus 1.22% of men (p<0.01) (Table 1). Sex was not strongly associated with most risk factors of anosmia/ageusia, with the exception of working outside home (44.7% in men *versus* 40.6% in women, p<0.001) (Table 2). The significant association of anosmia/ageusia with gender only weakly attenuated over time, with the crude odds ratio (OR) decreasing from 1.57 (95% CI:

1  
2  
3 1.40-1.76) to 1.40 (1.14-1.71) (Table 3). While adjusting for other social characteristics (M0),  
4  
5 exposure risk factors (M1) and health variables (M2) did not strongly attenuate the  
6  
7 association, inclusion of essential occupations did (Supplementary table 1).  
8  
9

### 10 *Ethno-racial status*

11  
12 If we now consider ethno-racial affiliation, we find that all minority groups, to varying degrees  
13  
14 (from 1.79% to 2.67%, Table 1), reported anosmia more often than the majority population  
15  
16 (1.35%,  $p<0.001$ ).  
17  
18

19  
20 Ethno-racial affiliation was strongly associated with exposure risk factors, with the exception  
21  
22 of working outside home. For example, 72.6% of the racialized first-generation immigrants  
23  
24 reported living in a high-density place of residence (compared to 31.8% for the mainstream  
25  
26 population,  $p<0.001$ ) and 41.4% in an overcrowded housing (compared to 8.7% for the  
27  
28 mainstream population,  $p<0.001$ , Table 2).  
29  
30

31  
32 Over-risk of reporting anosmia/ageusia was recorded among racialized minorities both during  
33  
34 and after the epidemic peak (crude models), although non-significant after the peak for non-  
35  
36 racialized second-generation immigrants and racialized first-generation immigrants (Table 3).  
37  
38 Adjusting for the exposure risk factors that significantly attenuated the observed associations,  
39  
40 both during and after the peak (M1). After further adjusting for health variables, only racialized  
41  
42 second-generation immigrants (respectively 1.48 (1.19-1.83) and 1.42 (1.00-2.01) during and  
43  
44 after the peak), DOM or descendants of DOM native (1.50 (1.07-2.12) during the peak) and  
45  
46 non-racialized first-generation immigrants (1.77 (1.04-3.04) after the peak) remained at higher  
47  
48 risk of reporting anosmia/ageusia compared to the mainstream population (M2).  
49  
50  
51  
52  
53

### 54 *Social class*

55  
56 There were marked differences between occupational classes. The top categories appeared  
57  
58 to be most affected by anosmia/ageusia: 1.89% for middle executive professionals, 1.81% for  
59  
60

1  
2  
3 senior executive professionals and 1.83% for skilled employees, against 0.99% for skilled and  
4  
5 1.11% for low-skilled manual workers (Table 1).  
6  
7

8 These social groups are differently exposed to risk factors. Although senior executive  
9  
10 professionals are more likely to live in high-density areas than low-skilled manual workers  
11  
12 (53.5% compared to 27.4%), they are less likely to live in an overcrowded accommodation  
13  
14 (10.3% compared to 17.5%) and have more often been able to telework during the lockdown  
15  
16 (39.2% have worked outside the home compared to 56.9% for low-skilled manual workers,  
17  
18 Table 2).  
19  
20  
21

22 Marked evolutions are observed over time. In crude models, while the lower social categories  
23  
24 and self-employed were significantly less affected than senior executive professionals during  
25  
26 the peak, this most privileged social category did not appear to be more at risk of  
27  
28 anosmia/ageusia than the others after the peak (Table 3). Only middle executive professionals  
29  
30 were at increased risk after the peak, and only simultaneous adjustment on exposure risk  
31  
32 factors, health variables, essential occupations and regions lowered this association towards  
33  
34 the null (Supplementary Table 1).  
35  
36  
37  
38  
39  
40  
41  
42  
43  
44  
45  
46  
47  
48  
49  
50  
51  
52  
53  
54  
55  
56  
57  
58  
59  
60

Table 1. Socio-demographic characteristics associated with anosmia/ageusia

|                                               | <i>Anosmia/a<br/>geusia<sup>i</sup></i><br>n=2,052<br>(1.53%) | <i>P-value*</i>  | <i>Anosmia/ageu<br/>sia during peak</i><br>n=1,521<br>(1.12%) | <i>Anosmia/a<br/>geusia<br/>after peak</i><br>n=531<br>(0.41%) |
|-----------------------------------------------|---------------------------------------------------------------|------------------|---------------------------------------------------------------|----------------------------------------------------------------|
| <b>Age</b>                                    |                                                               | <b>&lt;0.001</b> |                                                               |                                                                |
| 18-24                                         | 253 (1.27)                                                    |                  | 168 (0.86)                                                    | 85 (0.41)                                                      |
| 25-34                                         | 431 (1.92)                                                    |                  | 322 (1.43)                                                    | 109 (0.48)                                                     |
| 35-44                                         | 510 (1.83)                                                    |                  | 379 (1.33)                                                    | 131 (0.50)                                                     |
| 45-54                                         | 521 (1.57)                                                    |                  | 407 (1.22)                                                    | 114 (0.35)                                                     |
| 55-64                                         | 337 (1.07)                                                    |                  | 245 (0.76)                                                    | 92 (0.31)                                                      |
| <b>Sex</b>                                    |                                                               | <b>&lt;0.001</b> |                                                               |                                                                |
| Men                                           | 773 (1.22)                                                    |                  | 570 (0.88)                                                    | 203 (0.34)                                                     |
| Women                                         | 1,279 (1.84)                                                  |                  | 951 (1.37)                                                    | 328 (0.47)                                                     |
| <b>Ethno-racial status</b>                    |                                                               | <b>&lt;0.001</b> |                                                               |                                                                |
| Mainstream population                         | 1,454 (1.35)                                                  |                  | 1,075 (0.98)                                                  | 379 (0.36)                                                     |
| Non-racialized first-generation immigrants    | 94 (2.20)                                                     |                  | 69 (1.48)                                                     | 25 (0.72)                                                      |
| Non-racialized second-generation immigrants   | 108 (1.79)                                                    |                  | 80 (1.37)                                                     | 28 (0.42)                                                      |
| Racialized first-generation immigrants        | 164 (1.86)                                                    |                  | 127 (1.43)                                                    | 37 (0.43)                                                      |
| Racialized second generation immigrants       | 170 (2.62)                                                    |                  | 125 (1.95)                                                    | 45 (0.67)                                                      |
| DOM or descendants of DOM native-             | 62 (2.67)                                                     |                  | 45 (1.95)                                                     | 17 (0.72)                                                      |
| <b>Social class</b>                           |                                                               | <b>&lt;0.001</b> |                                                               |                                                                |
| Self-employed and entrepreneurs               | 92 (1.39)                                                     |                  | 63 (0.91)                                                     | 29 (0.48)                                                      |
| Senior executive professionals                | 454 (1.81)                                                    |                  | 365 (1.45)                                                    | 89 (0.37)                                                      |
| Middle executive professionals                | 434 (1.89)                                                    |                  | 313 (1.35)                                                    | 121 (0.54)                                                     |
| Skilled employees                             | 203 (1.83)                                                    |                  | 160 (1.44)                                                    | 43 (0.39)                                                      |
| Low-skilled employees                         | 356 (1.56)                                                    |                  | 254 (1.10)                                                    | 102 (0.45)                                                     |
| Skilled manual workers                        | 125 (0.99)                                                    |                  | 87 (0.68)                                                     | 38 (0.31)                                                      |
| Low-skilled manual workers                    | 62 (1.11)                                                     |                  | 38 (0.76)                                                     | 24 (0.34)                                                      |
| Never worked and others                       | 326 (1.28)                                                    |                  | 241 (0.93)                                                    | 85 (0.35)                                                      |
| <b>Standard of living (in deciles)</b>        |                                                               | <b>0.003</b>     |                                                               |                                                                |
| D1                                            | 209 (1.41)                                                    |                  | 140 (0.92)                                                    | 69 (0.49)                                                      |
| D2-D3                                         | 316 (1.33)                                                    |                  | 221 (0.94)                                                    | 95 (0.39)                                                      |
| D4-D5                                         | 349 (1.49)                                                    |                  | 255 (1.10)                                                    | 94 (0.39)                                                      |
| D6-D7                                         | 389 (1.47)                                                    |                  | 295 (1.10)                                                    | 94 (0.37)                                                      |
| D8-D9                                         | 519 (1.77)                                                    |                  | 388 (1.32)                                                    | 131 (0.45)                                                     |
| D10                                           | 247 (1.74)                                                    |                  | 209 (1.46)                                                    | 38 (0.28)                                                      |
| <b>Formal education</b>                       |                                                               | <b>&lt;0.001</b> |                                                               |                                                                |
| No diploma                                    | 123 (1.43)                                                    |                  | 82 (0.89)                                                     | 41 (0.54)                                                      |
| Primary education                             | 74 (1.03)                                                     |                  | 53 (0.77)                                                     | 21 (0.25)                                                      |
| Vocational secondary                          | 335 (1.17)                                                    |                  | 229 (0.80)                                                    | 106 (0.36)                                                     |
| High school                                   | 467 (1.48)                                                    |                  | 330 (1.03)                                                    | 137 (0.44)                                                     |
| High school +2 to 4 years                     | 663 (1.82)                                                    |                  | 502 (1.38)                                                    | 161 (0.44)                                                     |
| High school +5 or more years                  | 390 (1.95)                                                    |                  | 325 (1.62)                                                    | 65 (0.33)                                                      |
| <b>Working arrangement during lockdown</b>    |                                                               | <b>&lt;0.001</b> |                                                               |                                                                |
| Not working and others                        | 669 (1.33)                                                    |                  | 484 (0.96)                                                    | 185 (0.38)                                                     |
| Remote working only                           | 376 (1.79)                                                    |                  | 308 (1.46)                                                    | 68 (0.33)                                                      |
| Working outside the home<br>partly or only    | 1,007 (1.62)                                                  |                  | 729 (1.16)                                                    | 278 (0.45)                                                     |
| <b>High density of the place of residence</b> |                                                               | <b>&lt;0.001</b> |                                                               |                                                                |
| No                                            | 1,078 (1.21)                                                  |                  | 778 (0.85)                                                    | 300 (0.36)                                                     |
| Yes                                           | 974 (2.04)                                                    |                  | 743 (1.56)                                                    | 231 (0.49)                                                     |
| <b>Overcrowded housing</b>                    |                                                               | <b>&lt;0.001</b> |                                                               |                                                                |
| No                                            | 1,719 (1.44)                                                  |                  | 1,280 (1.07)                                                  | 439 (0.37)                                                     |

|    |                                              |              |                  |            |
|----|----------------------------------------------|--------------|------------------|------------|
| 1  |                                              |              |                  |            |
| 2  |                                              |              |                  |            |
| 3  | Yes                                          | 333 (2.12)   | 241 (1.47)       | 92 (0.64)  |
| 4  | <b>Number of persons living in the house</b> |              | <b>&lt;0.001</b> |            |
| 5  | 1                                            | 232 (1.34)   | 175 (1.01)       | 57 (0.33)  |
| 6  | 2                                            | 472 (1.28)   | 348 (0.94)       | 124 (0.35) |
| 7  | 3-4                                          | 979 (1.61)   | 720 (1.17)       | 259 (0.44) |
| 8  | 5 or more                                    | 369 (1.95)   | 278 (1.46)       | 91 (0.49)  |
| 9  | <b>Essential occupation</b>                  |              | <b>&lt;0.001</b> |            |
| 10 | No                                           | 1,193 (1.39) | 908 (1.05)       | 285 (0.34) |
| 11 | Healthcare workers                           | 205 (2.94)   | 131 (1.78)       | 74 (1.16)  |
| 12 | Others                                       | 654 (1.61)   | 482 (1.18)       | 172 (0.43) |
| 13 | <b>Region</b>                                |              | <b>&lt;0.001</b> |            |
| 14 | Least affected regions                       | 866 (1.04)   | 622 (0.73)       | 244 (0.31) |
| 15 | Grand Est                                    | 305 (2.15)   | 242 (1.72)       | 63 (0.43)  |
| 16 | Hauts-de-France                              | 215 (1.50)   | 147 (1.03)       | 68 (0.47)  |
| 17 | Ile-de-France                                | 666 (2.85)   | 510 (2.16)       | 156 (0.68) |

Significant Chi-2 tests are indicated in bold.

i: symptoms were recorded if they occurred between the 17<sup>th</sup> of March, 2020 and the date of survey (from 2<sup>nd</sup> of May to 2<sup>nd</sup> of June, 2020).

\*Chi-2 test for anosmia/ageusia during the whole period (yes, no).

Table 2. Socio-demographic characteristics associated with COVID-19 risk factors

|                                                | High density of<br>the place of<br>residence<br><i>n</i> =27,104<br>(38.6%) | Overcrowded<br>housing<br><i>n</i> =8,430 (13.2%) | Worked outside<br>the home during<br>lockdown<br><i>n</i> =37,129<br>(47.7%) |
|------------------------------------------------|-----------------------------------------------------------------------------|---------------------------------------------------|------------------------------------------------------------------------------|
| <b>Age (years)</b>                             |                                                                             |                                                   |                                                                              |
| 18-24                                          | 3,506 (38.5)                                                                | 1,225 (13.9)                                      | 2,794 (27.5)                                                                 |
| 25-34                                          | 5,504 (47.2)                                                                | 2,051 (18.1)                                      | 6,366 (50.1)                                                                 |
| 35-44                                          | 6,128 (39.8)                                                                | 2,786 (19.8)                                      | 9,239 (56.0)                                                                 |
| 45-54                                          | 6,298 (35.7)                                                                | 1,748 (11.6)                                      | 11,374 (59.0)                                                                |
| 55-64                                          | 5,668 (33.5)                                                                | 620 (4.5)                                         | 7,356 (39.1)                                                                 |
| <b>Sex</b>                                     |                                                                             |                                                   |                                                                              |
| Men                                            | 12,404 (38.1)                                                               | 3,880 (13.1)                                      | 18,148 (50.6)                                                                |
| Women                                          | 14,700 (39.0)                                                               | 4,550 (13.4)                                      | 18,981 (44.7)                                                                |
| <b>Ethno-racial status</b>                     |                                                                             |                                                   |                                                                              |
| Mainstream population                          | 18,772 (31.8)                                                               | 4,823 (8.7)                                       | 30,625 (49.0)                                                                |
| Non-racialized first-generation<br>immigrants  | 1,128 (51.0)                                                                | 432 (21.3)                                        | 1,100 (47.0)                                                                 |
| Non-racialized second-generation<br>immigrants | 1,391 (40.1)                                                                | 360 (11.0)                                        | 1,815 (48.1)                                                                 |
| Racialized first-generation<br>immigrants      | 2,894 (72.6)                                                                | 1,655 (41.4)                                      | 1,744 (41.4)                                                                 |
| Racialized second generation<br>immigrants     | 2,297 (68.0)                                                                | 954 (29.2)                                        | 1,303 (37.4)                                                                 |
| DOM or descendants of DOM native               | 622 (56.6)                                                                  | 206 (20.5)                                        | 542 (48.5)                                                                   |
| <b>Social class</b>                            |                                                                             |                                                   |                                                                              |
| Self-employed and entrepreneurs                | 1,133 (32.0)                                                                | 390 (11.7)                                        | 2,671 (68.1)                                                                 |
| Senior executive professionals                 | 7,959 (53.5)                                                                | 1,373 (10.3)                                      | 6,448 (39.2)                                                                 |
| Middle executive professionals                 | 4,633 (36.4)                                                                | 1,235 (10.2)                                      | 8,142 (57.9)                                                                 |
| Skilled employees                              | 2,494 (41.2)                                                                | 708 (12.2)                                        | 3,543 (52.0)                                                                 |
| Low-skilled employees                          | 3,885 (36.1)                                                                | 1,498 (13.7)                                      | 7,562 (58.1)                                                                 |
| Skilled manual workers                         | 1,589 (28.7)                                                                | 862 (15.0)                                        | 4,466 (66.1)                                                                 |
| Low-skilled manual workers                     | 743 (27.4)                                                                  | 515 (17.5)                                        | 1,843 (56.9)                                                                 |
| Never worked and others                        | 4,668 (38.9)                                                                | 1,849 (16.7)                                      | 2,454 (16.6)                                                                 |
| <b>Standard of living (in deciles)</b>         |                                                                             |                                                   |                                                                              |
| D1                                             | 3,068 (46.9)                                                                | 1,794 (28.2)                                      | 2,796 (34.7)                                                                 |
| D2-D3                                          | 4,082 (40.4)                                                                | 2,317 (22.1)                                      | 5,405 (45.5)                                                                 |
| D4-D5                                          | 3,761 (33.1)                                                                | 1,506 (12.8)                                      | 7,065 (53.4)                                                                 |
| D6-D7                                          | 4,512 (31.9)                                                                | 1,262 (8.5)                                       | 8,595 (54.6)                                                                 |
| D8-D9                                          | 6,586 (37.7)                                                                | 1,100 (6.3)                                       | 8,973 (47.7)                                                                 |
| D10                                            | 4,773 (49.8)                                                                | 385 (4.3)                                         | 4,032 (40.1)                                                                 |
| <b>Formal education</b>                        |                                                                             |                                                   |                                                                              |
| No diploma                                     | 1,790 (42.9)                                                                | 1,065 (24.7)                                      | 2,052 (42.3)                                                                 |
| Primary education                              | 1,093 (34.8)                                                                | 455 (13.5)                                        | 1,375 (39.4)                                                                 |
| Vocational secondary                           | 3,670 (27.0)                                                                | 1,613 (12.1)                                      | 8,848 (56.9)                                                                 |
| High school                                    | 5,356 (34.4)                                                                | 2,036 (13.2)                                      | 8,810 (48.9)                                                                 |
| High school +2 to 4 years                      | 8,007 (39.0)                                                                | 1,991 (10.5)                                      | 11,252 (49.0)                                                                |
| High school +5 or more years                   | 7,188 (61.1)                                                                | 1,270 (11.7)                                      | 4,792 (36.5)                                                                 |
| <b>Region</b>                                  |                                                                             |                                                   |                                                                              |
| Least affected regions                         | 11,829 (26.8)                                                               | 4,186 (10.3)                                      | 24,673 (51.0)                                                                |
| Grand Est                                      | 1,829 (26.4)                                                                | 551 (9.1)                                         | 3,814 (49.3)                                                                 |
| Hauts de France                                | 2,294 (34.2)                                                                | 858 (12.3)                                        | 3,631 (44.5)                                                                 |
| Ile-de-France                                  | 11,152 (83.4)                                                               | 2,835 (24.8)                                      | 5,011 (37.8)                                                                 |

1  
2  
3  
4  
5  
6  
7  
8  
9  
10  
11  
12  
13  
14  
15  
16  
17  
18  
19  
20  
21  
22  
23  
24  
25  
26  
27  
28  
29  
30  
31  
32  
33  
34  
35  
36  
37  
38  
39  
40  
41  
42  
43  
44  
45  
46  
47  
48  
49  
50  
51  
52  
53  
54  
55  
56  
57  
58  
59  
60

All socio-demographic variables were significantly associated with each three COVID-19 exposure risk factors (P-value <0.001, Chi-2 tests), except sex with high density (P-value=0.051) and overcrowded housing (P-value=0.30).

For peer review only



Table 3. Factors associated with anosmia/ageusia during or after the first epidemic peak (as compared to no reported anosmia/ageusia starting after lockdown). Multinomial logistic regressions.

|                                             | Crude model             |                         | M0<br>+ Social variables |                         | M1<br>+ Exposure variables <sup>a</sup> |                         | M2<br>+ Health variables |                         |
|---------------------------------------------|-------------------------|-------------------------|--------------------------|-------------------------|-----------------------------------------|-------------------------|--------------------------|-------------------------|
|                                             | <i>During peak</i>      | <i>After peak</i>       | <i>During peak</i>       | <i>After peak</i>       | <i>During peak</i>                      | <i>After peak</i>       | <i>During peak</i>       | <i>After peak</i>       |
|                                             | <i>OR (95% CI)</i>      | <i>OR (95% CI)</i>      | <i>OR (95% CI)</i>       | <i>OR (95% CI)</i>      | <i>OR (95% CI)</i>                      | <i>OR (95% CI)</i>      | <i>OR (95% CI)</i>       | <i>OR (95% CI)</i>      |
| <b>Age</b>                                  |                         |                         |                          |                         |                                         |                         |                          |                         |
| 18-24                                       | 1                       | 1                       | 1                        | 1                       | 1                                       | 1                       | 1                        | 1                       |
| 25-34                                       | <b>1.68 (1.36-2.07)</b> | 1.18 (0.87-1.60)        | <b>1.44 (1.15-1.80)</b>  | 1.03 (0.77-1.47)        | <b>1.45 (1.16-1.82)</b>                 | 1.04 (0.73-1.48)        | <b>1.43 (1.14-1.80)</b>  | 0.93 (0.66-1.32)        |
| 35-44                                       | <b>1.56 (1.27-1.91)</b> | 1.22 (0.91-1.65)        | <b>1.36 (1.09-1.68)</b>  | 1.07 (0.76-1.51)        | <b>1.41 (1.13-1.76)</b>                 | 1.08 (0.76-1.52)        | <b>1.37 (1.10-1.72)</b>  | 0.90 (0.64-1.27)        |
| 45-54                                       | <b>1.43 (1.17-1.74)</b> | 0.86 (0.63-1.18)        | <b>1.30 (1.05-1.61)</b>  | <b>0.77 (0.54-1.09)</b> | <b>1.37 (1.10-1.70)</b>                 | 0.80 (0.55-1.14)        | <b>1.31 (1.05-1.63)</b>  | <b>0.63 (0.44-0.90)</b> |
| 55-64                                       | 0.89 (0.71-1.11)        | 0.76 (0.54-1.06)        | 0.84 (0.66-1.06)         | <b>0.67 (0.44-1.02)</b> | 0.91 (0.72-1.14)                        | 0.73 (0.47-1.12)        | 0.84 (0.66-1.07)         | <b>0.54 (0.36-0.82)</b> |
| <b>Sex</b>                                  |                         |                         |                          |                         |                                         |                         |                          |                         |
| Men                                         | 1                       | 1                       | 1                        | 1                       | 1                                       | 1                       | 1                        | 1                       |
| Women                                       | <b>1.57 (1.40-1.76)</b> | <b>1.40 (1.14-1.71)</b> | <b>1.52 (1.34-1.71)</b>  | <b>1.37 (1.10-1.70)</b> | <b>1.52 (1.35-1.72)</b>                 | <b>1.38 (1.11-1.71)</b> | <b>1.51 (1.34-1.70)</b>  | <b>1.42 (1.14-1.77)</b> |
| <b>Ethno-racial status</b>                  |                         |                         |                          |                         |                                         |                         |                          |                         |
| Mainstream population                       | 1                       | 1                       | 1                        | 1                       | 1                                       | 1                       | 1                        | 1                       |
| Non-racialized first-generation immigrants  | <b>1.52 (1.16-2.00)</b> | <b>2.00 (1.14-3.53)</b> | <b>1.55 (1.18-2.04)</b>  | <b>2.08 (1.18-3.65)</b> | 1.25 (0.95-1.65)                        | <b>1.71 (1.00-2.94)</b> | 1.26 (0.95-1.66)         | <b>1.77 (1.04-3.04)</b> |
| Non-racialized second-generation immigrants | <b>1.40 (1.07-1.82)</b> | 1.16 (0.77-1.76)        | <b>1.41 (1.09-1.84)</b>  | 1.17 (0.77-1.77)        | 1.26 (0.97-1.64)                        | 1.08 (0.71-1.63)        | 1.26 (0.96-1.64)         | 1.07 (0.71-1.62)        |
| Racialized first-generation immigrants      | <b>1.46 (1.18-1.80)</b> | 1.20 (0.82-1.75)        | <b>1.52 (1.23-1.88)</b>  | 1.24 (0.84-1.83)        | 1.08 (0.87-1.35)                        | 0.89 (0.60-1.33)        | 1.12 (0.89-1.40)         | 0.95 (0.64-1.42)        |
| Racialized second generation immigrants     | <b>2.01 (1.63-2.48)</b> | <b>1.87 (1.34-2.63)</b> | <b>1.97 (1.59-2.43)</b>  | <b>1.79 (1.27-2.51)</b> | <b>1.46 (1.18-1.81)</b>                 | 1.39 (0.98-1.98)        | <b>1.48 (1.19-1.83)</b>  | <b>1.42 (1.00-2.01)</b> |
| DOM or descendants of DOM native            | <b>2.01 (1.43-2.81)</b> | <b>2.02 (1.21-3.36)</b> | <b>1.96 (1.40-2.75)</b>  | <b>1.93 (1.16-3.24)</b> | <b>1.50 (1.07-2.11)</b>                 | 1.56 (0.93-2.60)        | <b>1.50 (1.07-2.12)</b>  | 1.50 (0.89-2.52)        |
| <b>Social class</b>                         |                         |                         |                          |                         |                                         |                         |                          |                         |
| Self-employed and entrepreneurs             | <b>0.62 (0.47-0.83)</b> | 1.30 (0.77-2.19)        | <b>0.66 (0.49-0.88)</b>  | 1.35 (0.81-2.27)        | 0.77 (0.57-1.04)                        | 1.30 (0.77-2.18)        | 0.79 (0.58-1.07)         | 1.25 (0.74-2.11)        |
| Senior executive professionals              | 1                       | 1                       | 1                        | 1                       | 1                                       | 1                       | 1                        | 1                       |
| Middle executive professionals              | 0.93 (0.79-1.10)        | <b>1.47 (1.09-1.98)</b> | 0.92 (0.78-1.08)         | <b>1.44 (1.07-1.95)</b> | 1.04 (0.88-1.24)                        | <b>1.43 (1.05-1.94)</b> | 1.05 (0.88-1.24)         | <b>1.36 (1.00-1.85)</b> |
| Skilled employees                           | 0.99 (0.81-1.21)        | 1.07 (0.73-1.58)        | 0.83 (0.67-1.02)         | 0.91 (0.62-1.35)        | 0.95 (0.77-1.17)                        | 0.93 (0.62-1.39)        | 0.95 (0.77-1.17)         | 0.91 (0.61-1.35)        |

1  
2  
3  
4  
5  
6  
7  
8  
9  
10  
11  
12  
13  
14  
15  
16  
17  
18  
19  
20  
21  
22  
23  
24  
25  
26  
27  
28  
29  
30  
31  
32  
33  
34  
35  
36  
37  
38  
39  
40  
41  
42  
43  
44  
45  
46

|                                               |                         |                         |                         |                  |                         |                         |                         |                         |
|-----------------------------------------------|-------------------------|-------------------------|-------------------------|------------------|-------------------------|-------------------------|-------------------------|-------------------------|
| Low-skilled employees                         | <b>0.76 (0.64-0.91)</b> | 1.23 (0.90-1.68)        | <b>0.70 (0.59-0.84)</b> | 1.17 (0.85-1.61) | <b>0.80 (0.66-0.97)</b> | 1.09 (0.77-1.53)        | <b>0.81 (0.67-0.99)</b> | 1.00 (0.71-1.41)        |
| Skilled manual workers                        | <b>0.47 (0.35-0.62)</b> | 0.83 (0.55-1.24)        | <b>0.51 (0.39-0.67)</b> | 0.89 (0.59-1.33) | <b>0.61 (0.46-0.82)</b> | 0.85 (0.55-1.30)        | <b>0.63 (0.47-0.83)</b> | 0.79 (0.51-1.21)        |
| Low-skilled manual workers                    | <b>0.52 (0.35-0.79)</b> | 0.93 (0.57-1.54)        | <b>0.52 (0.34-0.78)</b> | 0.91 (0.55-1.51) | 0.65 (0.43-1.00)        | 0.90 (0.53-1.51)        | 0.67 (0.44-1.02)        | 0.82 (0.49-1.39)        |
| Never worked and others                       | <b>0.64 (0.54-0.77)</b> | 0.94 (0.67-1.33)        | <b>0.64 (0.53-0.78)</b> | 0.85 (0.57-1.29) | 0.81 (0.64-1.01)        | 0.85 (0.54-1.33)        | 0.81 (0.64-1.01)        | 0.80 (0.51-1.25)        |
| <b>High density of the place of residence</b> |                         |                         |                         |                  |                         |                         |                         |                         |
| No                                            | 1                       | 1                       |                         |                  | 1                       | 1                       | 1                       | 1                       |
| Yes                                           | <b>1.83 (1.64-2.05)</b> | <b>1.38 (1.14-1.68)</b> |                         |                  | 1.21 (1.06-1.38)        | 0.96 (0.77-1.21)        | <b>1.21 (1.06-1.38)</b> | 0.95 (0.76-1.20)        |
| <b>Overcrowded housing</b>                    |                         |                         |                         |                  |                         |                         |                         |                         |
| No                                            | 1                       | 1                       |                         |                  | 1                       | 1                       | 1                       | 1                       |
| Yes                                           | <b>1.38 (1.19-1.62)</b> | <b>1.74 (1.32-2.31)</b> |                         |                  | 1.03 (0.87-1.21)        | <b>1.41 (1.05-1.89)</b> | 1.04 (0.88-1.22)        | <b>1.41 (1.05-1.89)</b> |
| <b>Working arrangement during lockdown</b>    |                         |                         |                         |                  |                         |                         |                         |                         |
| Remote working only                           | 1                       | 1                       |                         |                  | 1                       | 1                       | 1                       | 1                       |
| Not working and others                        | <b>0.65 (0.56-0.76)</b> | 1.13 (0.84-1.53)        |                         |                  | 1.00 (0.82-1.21)        | <b>1.41 (1.00-1.99)</b> | 0.99 (0.82-1.21)        | 1.34 (0.95-1.88)        |
| Working outside the home partly or only       | <b>0.80 (0.69-0.92)</b> | <b>1.36 (1.03-1.81)</b> |                         |                  | <b>1.18 (1.01-1.38)</b> | <b>1.65 (1.22-2.21)</b> | <b>1.19 (1.02-1.40)</b> | <b>1.64 (1.21-2.20)</b> |

Significant associations are indicated in bold.  
a: including regions (data not shown).

For peer review only

## DISCUSSION

### Main study results

Our results are based on data documenting exposure factors and symptoms during the first epidemic wave. By distinguishing infections which probably occurred at the time of the epidemic peak (just before or in the very first days after the start of lockdown), from those which occurred later (during and early after the lockdown, as the epidemic declined), a change in the social profile of the affected people emerged. This allowed us to unmask social characteristics and exposure risk factors that increased the risk of infection during and/or after the first epidemic peak, which would have been masked by an analysis over the whole period.

Our results point that women and ethno-racial minorities were at higher risk of anosmia/ageusia during the peak and after. While senior executive professionals were more affected than lower social classes at the peak of the epidemic, this effect disappeared after.

We show that important exposure factors likely to increase contact with the virus, *i.e.* the density of the place of residence, living in overcrowded housing, and having worked outside the home during lockdown<sup>4 17</sup> have not been evenly distributed across social groups, and also that some social groups do cumulate these risk factors. Hence, racialized minorities, the least educated, and those with the lowest financial resources are particularly affected by living in densely populated communities and overcrowded housing. These data reflect the well-documented effects of socio-spatial segregation policies<sup>20</sup>. Furthermore, among those who continued to work during lockdown, working class groups have been more likely to work outside the home than senior managers who were able to work remotely, to a large extent.

### Interpretation of findings

The persistent increased risk of anosmia/ageusia among women compared to men are likely to reflect occupational specificities, beyond the categories used here. Indeed, women are

1  
2  
3 over-represented in the nursing and care assistant occupations as well as in cleaning  
4 activities<sup>22</sup>. In addition, they take care of children and the elderly<sup>23 24</sup>, which may increase their  
5  
6 social contacts. This greater exposure of women raises questions as they are shown to be less  
7  
8 likely to die from COVID-19 than men, which may partly reflect their lower rates of  
9  
10 comorbidities<sup>5</sup>.  
11  
12

13  
14  
15 With regard to ethno-racial status, the persistent higher risk of reporting anosmia/ageusia  
16  
17 among racialized people was not linked to a lower propensity to wear a mask<sup>11</sup>. It may instead  
18  
19 be indicative of social contacts in neighborhoods where the circulation of the virus was and  
20  
21 remained higher over time, as suggested by our results, since their increased risk was  
22  
23 substantially attenuated after adjusting for density of place of residence and overcrowded  
24  
25 housing. Understanding determinants of infection among those minorities throughout the  
26  
27 epidemic is all the more so important as a higher likelihood of dying from COVID-19 was  
28  
29 reported in many countries, including France<sup>5 9 25</sup>.  
30  
31  
32  
33

34  
35 Whereas senior executive professionals were more affected than lower social classes at the  
36  
37 peak of the epidemic, this effect disappeared afterwards. Only middle executive professionals  
38  
39 were at higher risk during the epidemic decline, which was likely due to the presence of health  
40  
41 professionals, particularly nurses, in this group, as this association totally disappeared when  
42  
43 further adjusted for essential occupations. The increased risk among essential occupations  
44  
45 was particularly sharp for health professionals, due to the continuous care provided to  
46  
47 patients with a high viral load<sup>16</sup>. It is important to note that the other so-called essential  
48  
49 occupations were overexposed after the peak of the epidemic, this group includes those in  
50  
51 regular contact with the public such as cashiers, bus drivers, etc. Such results call for an in-  
52  
53 depth and longitudinal analysis of occupational disparities in COVID-19 exposure based on the  
54  
55 combination of type of job (e.g. healthcare, high-contact jobs, etc.), working arrangement  
56  
57  
58  
59  
60

1  
2  
3 (remote, on-site, layoff), as well as implementation of preventive measures at the worksite.  
4  
5 Indeed, the higher risk of infection of people who worked outside the home during lockdown  
6  
7 was particularly marked after the peak of the epidemic, *i.e.* during a period of epidemic decline  
8  
9 when contact with the virus was proportionally more marked among on-site workers as  
10  
11 compared to people who stayed at home.  
12  
13

14  
15 It should also be noted that the density of the place of residence was no longer related to the  
16  
17 reporting of anosmia/ageusia occurring after the peak of the epidemic probably because the  
18  
19 virus circulates less in the neighborhood, thanks to the lockdown. On the contrary,  
20  
21 overcrowding was significantly associated after the peak only, probably due to the higher risk  
22  
23 of COVID-19 transmission linked to unavoidable close proximity and/or large number of  
24  
25 people in the household. Background rates and circulation patterns of SARS-CoV-2 should be  
26  
27 considered while looking at the social and spatial dynamics of the epidemic<sup>26</sup>, as they  
28  
29 influence the relative importance of community and workplace transmission<sup>27</sup>.  
30  
31  
32  
33

### 34 **Study limitations**

35  
36 Our analysis has nevertheless some limitations. First, as any national population-based survey,  
37  
38 the study fails to capture highly vulnerable groups such as undocumented migrants and  
39  
40 homeless people, who are particularly affected by the pandemic<sup>28</sup>.  
41  
42

43  
44 Additionally, due to a shortage of tests at the national level in the early stage of the epidemic,  
45  
46 our analyses are based on reported symptoms of anosmia/ageusia rather than on biologically  
47  
48 confirmed cases. This excludes infected people reporting other symptoms, and of course  
49  
50 asymptomatic individuals who represent one out of six of the infected population according  
51  
52 to a recent meta-analysis<sup>29</sup>.  
53  
54

55  
56 Although anosmia/ageusia reporting may be socially differentiated, especially due to  
57  
58 differences in recognition of symptoms, it is reasonable to assume that such a bias did not  
59  
60

1  
2  
3 vary during the month of the survey. One might also think that women are more likely to  
4 report anosmia/ageusia since they have a heightened sense of smell compared to men, as  
5 shown by sociological studies<sup>30</sup>. Nevertheless, the ratio of women to men reporting such  
6 symptoms is only slightly larger than that recorded for seroprevalence in a sub-sample of the  
7 same cohort<sup>31</sup> as found in other European countries<sup>32</sup>.

14  
15 We chose to focus on anosmia/ageusia only, which are the most specific symptoms of COVID-  
16 19<sup>18 19</sup>, so that our analyses would be more robust<sup>33</sup>. Indicative of internal validity, our results  
17 are consistent with epidemiological surveillance data by region<sup>34</sup> as well as with data on  
18 increased risk of infection in people with chronic conditions<sup>16 35</sup>, and instead a protective  
19 effect of smoking<sup>36</sup>.

20  
21 Finally, while it was not possible to build clear-cut periods of “likely infection” based on the  
22 timing of symptoms reported by the participants, the broad distinction made between people  
23 for whom symptoms started during the epidemic peak *versus* after it, allowed us to compare  
24 an early stage of the epidemic with the phase of decline in the incidence corresponding to the  
25 first lockdown in France.

## 26 27 28 29 30 31 32 33 34 35 36 37 38 39 40 **Conclusion**

41  
42 To our knowledge, EpiCoV is one of the first socio-epidemiological surveys conducted among  
43 a very large random sample of a national population that simultaneously considers living  
44 conditions and health data and allows for an intersectional analysis of social inequalities by  
45 gender, ethno-racial status and social class. Our results show the importance of closely  
46 monitoring social changes over time to implement prevention policies that do not contribute  
47 to increasing the already significant social inequalities in health. In all, the associations  
48 reported during the epidemic peak – lower exposures among low-skilled jobs than senior  
49 executives, over-exposure among all ethno-racial minorities compared to the majority  
50  
51  
52  
53  
54  
55  
56  
57  
58  
59  
60

1  
2  
3 population, with a strong influence of overcrowding and population density – are likely to  
4  
5 reflect the social profile and associated risk factors that prevailed just before the  
6  
7 implementation of stay-at-home measures and national lockdown. By contrast, those  
8  
9 observed after the peak point to a shift in the social profile of the epidemic related to a shift  
10  
11 in exposure factors under the implementation of stringent collective prevention measures.  
12  
13 They notably stress the importance of working outside the home, all the more so in essential  
14  
15 occupations, particularly, though not exclusively, for healthcare workers<sup>37</sup>. The persistent  
16  
17 excess risk among women and some ethno-racial minorities call for further research.  
18  
19  
20  
21  
22  
23  
24  
25

## 26 **Acknowledgments**

27  
28 The authors warmly thank all the volunteers of the EpiCoV cohort.

29  
30 We thank the DREES and INSEE teams for the creation of the sample, the calculation of the  
31  
32 survey weights and the logistics of the survey.  
33  
34

35  
36 We thank the staff of the IPSOS team that have worked with dedication and engagement to  
37  
38 collect and manage the data used for this study  
39

40  
41 We thank the INSERM Santé Publique team, especially Sylvain Durrleman, and Frédéric  
42  
43 Robergeau, responsible for the management of the database.  
44  
45

## 46 **Competing interest**

47  
48 None  
49

## 50 **Funding**

51  
52  
53  
54  
55  
56 Inserm (Institut National de la Santé et de la Recherche Médicale).

57  
58 French Ministry for Research  
59  
60

1  
2  
3 Drees  
4

5 The funders facilitated data acquisition but had no role in the design, analysis, interpretation,  
6 or writing.  
7

8  
9 Dr. Bajos has received funding from the European Research Council (ERC) under the European  
10 Union's Horizon 2020 research and innovation program (grant agreement No. [856478]).  
11  
12  
13

#### 14 15 **Authors and contributors** 16

17 NB had full access to all the data in the study and takes responsibility for the integrity of the  
18 data and the accuracy of the data analysis. IPSOS collected data. NB, EC and JF provided the  
19 study concept and design. JF made the statistical analysis and NB, EC, JF, LM and JW  
20 interpreted the results. RS obtained funding. NL contributed as administrative support. NB  
21 and JW supervised the study. NB, EC and JF drafted the first manuscript and NB, EC, JF, FJ, AP,  
22 AS, CM, NL, RS, LM and JW contributed to the final manuscript.  
23  
24  
25

#### 26 27 **Data availability statement** 28

29 Data are available from the corresponding author on reasonable request.  
30  
31  
32  
33  
34  
35  
36  
37  
38  
39  
40  
41  
42  
43  
44  
45  
46  
47  
48  
49  
50  
51  
52  
53  
54  
55  
56  
57  
58  
59  
60



## References

1. Bambra C, Riordan R, Ford J, et al. The COVID-19 pandemic and health inequalities. *J Epidemiol Community Health* 2020;74(11):964-68. doi: 10.1136/jech-2020-214401
2. Shadmi E, Chen Y, Dourado I, et al. Health equity and COVID-19: global perspectives. *Int J Equity Health* 2020;19(1):104. doi: 10.1186/s12939-020-01218-z
3. Wang Z, Tang K. Combating COVID-19: health equity matters. *Nat Med* 2020;26(4):458. doi: 10.1038/s41591-020-0823-6
4. Wachtler B, Hoebel J. [Social Inequalities and COVID-19: Social-Epidemiological Perspectives on the Pandemic]. *Gesundheitswesen* 2020;82(8-09):670-75. doi: 10.1055/a-1226-6708
5. Williamson EJ, Walker AJ, Bhaskaran K, et al. Factors associated with COVID-19-related death using OpenSAFELY. *Nature* 2020;584(7821):430-36. doi: 10.1038/s41586-020-2521-4
6. Sze S, Pan D, Nevill CR, et al. Ethnicity and clinical outcomes in COVID-19: A systematic review and meta-analysis. *EClinicalMedicine* 2020;29:100630. doi: 10.1016/j.eclinm.2020.100630
7. Meyerowitz-Katz G, Merone L. A systematic review and meta-analysis of published research data on COVID-19 infection fatality rates. *Int J Infect Dis* 2020;101:138-48. doi: 10.1016/j.ijid.2020.09.1464
8. Wright L, Steptoe A, Fancourt D. Are we all in this together? Longitudinal assessment of cumulative adversities by socioeconomic position in the first 3 weeks of lockdown in the UK. *J Epidemiol Community Health* 2020;74(9):683-88. doi: 10.1136/jech-2020-214475
9. Jefferies S, French N, Gilkison C, et al. COVID-19 in New Zealand and the impact of the national response: a descriptive epidemiological study. *Lancet Public Health* 2020;5(11):e612-e23. doi: 10.1016/S2468-2667(20)30225-5
10. Yang B, Wu P, Lau EHY, et al. Changing disparities in COVID-19 burden in the ethnically homogeneous population of Hong Kong through pandemic waves: an observational study. *Clin Infect Dis* 2021 doi: 10.1093/cid/ciab002
11. Bajos NW, J.; Pailhé, A.; Counil, E.; Jusot, F.; Spire, A.; Martin, C.; Meyer, L.; Sireyjol, A.; Franck, J.; Lydié, N.;. Les inégalités sociales au temps du COVID-19. *Questions de Santé Publique* 2020;N°40
12. Rutter PD, Mytton OT, Mak M, et al. Socio-economic disparities in mortality due to pandemic influenza in England. *Int J Public Health* 2012;57(4):745-50. doi: 10.1007/s00038-012-0337-1
13. Lowcock EC, Rosella LC, Foisy J, et al. The social determinants of health and pandemic H1N1 2009 influenza severity. *Am J Public Health* 2012;102(8):e51-8. doi: 10.2105/AJPH.2012.300814
14. Bauer GR. Incorporating intersectionality theory into population health research methodology: challenges and the potential to advance health equity. *Soc Sci Med* 2014;110:10-7. doi: 10.1016/j.socscimed.2014.03.022
15. Milner A, Jumbe S. Using the right words to address racial disparities in COVID-19. *Lancet Public Health* 2020;5(8):e419-e20. doi: 10.1016/S2468-2667(20)30162-6
16. Carrat F, Touvier M, Severi G, et al. Incidence and risk factors of COVID-19-like symptoms in the French general population during the lockdown period: a multi-cohort study. *BMC Infect Dis* 2021;21(1):169. doi: 10.1186/s12879-021-05864-8
17. Ward H, Atchison C, Whitaker M, et al. SARS-CoV-2 antibody prevalence in England following the first peak of the pandemic. *Nat Commun* 2021;12(1):905. doi: 10.1038/s41467-021-21237-w

18. Vos ERA, den Hartog G, Schepp RM, et al. Nationwide seroprevalence of SARS-CoV-2 and identification of risk factors in the general population of the Netherlands during the first epidemic wave. *J Epidemiol Community Health* 2020 doi: 10.1136/jech-2020-215678
19. Agyeman AA, Chin KL, Landersdorfer CB, et al. Smell and Taste Dysfunction in Patients With COVID-19: A Systematic Review and Meta-analysis. *Mayo Clin Proc* 2020;95(8):1621-31. doi: 10.1016/j.mayocp.2020.05.030
20. Beauchemin CH, C.; Simon, P. Trajectories and Origins: Survey on the Diversity of the French Population: Springer 2018.
21. Warszawski J, Bajos N, Barlet M, et al. A national mixed-mode seroprevalence random population-based cohort on SARS-CoV-2 epidemic in France: the socio-epidemiological EpiCov study. *medRxiv* 2021:2021.02.24.21252316. doi: 10.1101/2021.02.24.21252316
22. Argouarc'h J, Calavrezo O. La répartition des hommes et des femmes par métiers : une baisse de la ségrégation depuis 30 ans *Dares analyses* 2013;n° 79
23. Besnard XB, M.; Couvert, N.; Roy, Delphine. Les proches aidants des seniors et leur ressenti sur l'aide apportée - Résultats des enquêtes « CARE » auprès des aidants (2015-2016). *Les dossiers de la DREES* 2019;N° 45
24. Pailhé A, Solaz A, Stanfors M. The Great Convergence: Gender and Unpaid Work in Europe and the United States. *Population and Development Review* 2021;47(1):181-217. doi: <https://doi.org/10.1111/padr.12385>
25. Papon SR-BI. Une hausse des décès deux fois plus forte pour les personnes nées à l'étranger que pour celles nées en France en mars-avril 2020. *Insee Focus* 2020;No 198
26. Jay J, Bor J, Nsoesie EO, et al. Neighbourhood income and physical distancing during the COVID-19 pandemic in the United States. *Nat Hum Behav* 2020;4(12):1294-302. doi: 10.1038/s41562-020-00998-2
27. Ossimetha A, Ossimetha A, Kosar CM, et al. Socioeconomic Disparities in Community Mobility Reduction and COVID-19 Growth. *Mayo Clin Proc* 2021;96(1):78-85. doi: 10.1016/j.mayocp.2020.10.019
28. Tsai J, Wilson M. COVID-19: a potential public health problem for homeless populations. *Lancet Public Health* 2020;5(4):e186-e87. doi: 10.1016/S2468-2667(20)30053-0
29. Byambasuren OC, M.; Bell, K.; Clark, J.; McLaws, M.-L.; Glasziou, P. Estimating the extent of asymptomatic COVID-19 and its potential for community transmission: Systematic review and meta-analysis. *Off J Assoc Med Microbiol Infect Dis Can* 2020(5):223-34.
30. Sorokowski P, Karwowski M, Misiak M, et al. Sex Differences in Human Olfaction: A Meta-Analysis. *Front Psychol* 2019;10:242. doi: 10.3389/fpsyg.2019.00242
31. Warszawski Jea. In May 2020, 4.5% of the population of metropolitan France had developed antibodies against SARS-CoV-2. The first results of the EpiCov national survey. *Etudes et Résultats* 2020;N°1167
32. Lechien JR, Chiesa-Estomba CM, De Siati DR, et al. Olfactory and gustatory dysfunctions as a clinical presentation of mild-to-moderate forms of the coronavirus disease (COVID-19): a multicenter European study. *Eur Arch Otorhinolaryngol* 2020;277(8):2251-61. doi: 10.1007/s00405-020-05965-1
33. Rothman KG, S. *Modern Epidemiology*, 2nd Edition.: Lippincott Williams & Wilkins. 1998.
34. [Available from: <https://www.data.gouv.fr/fr/datasets/indicateurs-de-suivi-de-lepidemie-de-covid-19/> accessed April 2021.

- 1  
2  
3 35. Halpin DMG, Faner R, Sibila O, et al. Do chronic respiratory diseases or their treatment  
4 affect the risk of SARS-CoV-2 infection? *Lancet Respir Med* 2020;8(5):436-38. doi:  
5 10.1016/S2213-2600(20)30167-3  
6  
7 36. Zhao Q, Meng M, Kumar R, et al. The impact of COPD and smoking history on the severity  
8 of COVID-19: A systemic review and meta-analysis. *J Med Virol* 2020;92(10):1915-  
9 21. doi: 10.1002/jmv.25889  
10  
11 37. Fisher KA, Olson SM, Tenforde MW, et al. Telework Before Illness Onset Among  
12 Symptomatic Adults Aged  $\geq 18$  Years With and Without COVID-19 in 11 Outpatient  
13 Health Care Facilities - United States, July 2020. *MMWR Morb Mortal Wkly Rep*  
14 2020;69(44):1648-53. doi: 10.15585/mmwr.mm6944a4  
15  
16  
17  
18  
19  
20  
21  
22  
23  
24  
25  
26  
27  
28  
29  
30  
31  
32  
33  
34  
35  
36  
37  
38  
39  
40  
41  
42  
43  
44  
45  
46  
47  
48  
49  
50  
51  
52  
53  
54  
55  
56  
57  
58  
59  
60

For peer review only

## Supplementary Table 1

Factors associated with anosmia/ageusia during or after the epidemic peak (as compared to no reported anosmia/ageusia starting after lockdown). Multinomial logistic regressions.

|                                               | Crude model                        |                                   | Full adjusted model                |                                   |
|-----------------------------------------------|------------------------------------|-----------------------------------|------------------------------------|-----------------------------------|
|                                               | <i>During peak<br/>OR (95% CI)</i> | <i>After peak<br/>OR (95% CI)</i> | <i>During peak<br/>OR (95% CI)</i> | <i>After peak<br/>OR (95% CI)</i> |
| <b>Age</b>                                    |                                    |                                   |                                    |                                   |
| 18-24                                         | 1                                  | 1                                 | 1                                  | 1                                 |
| 25-34                                         | <b>1.68 (1.36-2.07)</b>            | 1.18 (0.87-1.60)                  | <b>1.51 (1.20-1.91)</b>            | 0.93 (0.65-1.33)                  |
| 35-44                                         | <b>1.56 (1.27-1.91)</b>            | 1.22 (0.91-1.65)                  | <b>1.39 (1.11-1.74)</b>            | 0.90 (0.64-1.27)                  |
| 45-54                                         | <b>1.43 (1.17-1.74)</b>            | 0.86 (0.63-1.18)                  | <b>1.34 (1.07-1.67)</b>            | <b>0.64 (0.44-0.91)</b>           |
| 55-64                                         | 0.89 (0.71-1.11)                   | 0.76 (0.54-1.06)                  | 0.92 (0.72-1.18)                   | <b>0.59 (0.38-0.91)</b>           |
| <b>Sex</b>                                    |                                    |                                   |                                    |                                   |
| Men                                           | 1                                  | 1                                 | 1                                  | 1                                 |
| Women                                         | <b>1.57 (1.40-1.76)</b>            | <b>1.40 (1.14-1.71)</b>           | <b>1.48 (1.31-1.68)</b>            | <b>1.27 (1.02-1.59)</b>           |
| <b>Ethno-racial status</b>                    |                                    |                                   |                                    |                                   |
| Mainstream population                         | 1                                  | 1                                 | 1                                  | 1                                 |
| Non-racialized first-generation immigrants    | <b>1.52 (1.16-2.00)</b>            | <b>2.00 (1.14-3.53)</b>           | 1.27 (0.97-1.68)                   | <b>1.85 (1.09-3.17)</b>           |
| Non-racialized second-generation immigrants   | <b>1.40 (1.07-1.82)</b>            | 1.16 (0.77-1.76)                  | 1.26 (0.97-1.64)                   | 1.08 (0.72-1.64)                  |
| Racialized first-generation immigrants        | <b>1.46 (1.18-1.80)</b>            | 1.20 (0.82-1.75)                  | 1.09 (0.87-1.36)                   | 0.96 (0.65-1.43)                  |
| Racialized second generation immigrants       | <b>2.01 (1.63-2.48)</b>            | <b>1.87 (1.34-2.63)</b>           | <b>1.44 (1.16-1.79)</b>            | <b>1.42 (1.00-2.01)</b>           |
| DOM or descendants of DOM native              | <b>2.01 (1.43-2.81)</b>            | <b>2.02 (1.21-3.36)</b>           | <b>1.50 (1.06-2.11)</b>            | 1.44 (0.85-2.42)                  |
| <b>Social class</b>                           |                                    |                                   |                                    |                                   |
| Self-employed and entrepreneurs               | <b>0.62 (0.47-0.83)</b>            | 1.30 (0.77-2.19)                  | 0.80 (0.59-1.09)                   | 1.44 (0.84-2.45)                  |
| Senior executive professionals                | 1                                  | 1                                 | 1                                  | 1                                 |
| Middle executive professionals                | 0.93 (0.79-1.10)                   | <b>1.47 (1.09-1.98)</b>           | 1.02 (0.86-1.21)                   | 1.18 (0.86-1.61)                  |
| Skilled employees                             | 0.99 (0.81-1.21)                   | 1.07 (0.73-1.58)                  | 0.96 (0.78-1.19)                   | 0.93 (0.62-1.39)                  |
| Low-skilled employees                         | <b>0.76 (0.64-0.91)</b>            | 1.23 (0.90-1.68)                  | 0.82 (0.67-1.00)                   | 1.05 (0.74-1.49)                  |
| Skilled manual workers                        | <b>0.47 (0.35-0.62)</b>            | 0.83 (0.55-1.24)                  | <b>0.64 (0.48-0.85)</b>            | 0.84 (0.54-1.31)                  |
| Low-skilled manual workers                    | <b>0.52 (0.35-0.79)</b>            | 0.93 (0.57-1.54)                  | 0.68 (0.44-1.04)                   | 0.92 (0.54-1.56)                  |
| Never worked and others                       | <b>0.64 (0.54-0.77)</b>            | 0.94 (0.67-1.33)                  | 0.81 (0.65-1.02)                   | 0.89 (0.56-1.41)                  |
| <b>High density of the place of residence</b> |                                    |                                   |                                    |                                   |
| No                                            | 1                                  | 1                                 | 1                                  | 1                                 |
| Yes                                           | <b>1.83 (1.64-2.05)</b>            | <b>1.38 (1.14-1.68)</b>           | <b>1.24 (1.08-1.41)</b>            | 0.97 (0.77-1.23)                  |
| <b>Overcrowded housing</b>                    |                                    |                                   |                                    |                                   |
| No                                            | 1                                  | 1                                 | 1                                  | 1                                 |
| Yes                                           | <b>1.38 (1.19-1.62)</b>            | <b>1.74 (1.32-2.31)</b>           | 0.92 (0.77-1.10)                   | <b>1.35 (0.96-1.90)</b>           |
| <b>Working arrangement during lockdown</b>    |                                    |                                   |                                    |                                   |
| Remote working only                           | 1                                  | 1                                 | 1                                  | 1                                 |
| Not working and others                        | <b>0.65 (0.56-0.76)</b>            | 1.13 (0.84-1.53)                  | 0.99 (0.81-1.22)                   | 1.38 (0.96-1.99)                  |
| Working outside the home partly or only       | <b>0.80 (0.69-0.92)</b>            | <b>1.36 (1.03-1.81)</b>           | 1.14 (0.96-1.34)                   | 1.25 (0.92-1.70)                  |
| <b>Smoking</b>                                |                                    |                                   |                                    |                                   |
| Daily                                         | 1                                  | 1                                 | 1                                  | 1                                 |
| Occasionally                                  | <b>1.63 (1.25-2.13)</b>            | 1.13 (0.74-1.73)                  | <b>1.50 (1.14-1.96)</b>            | 1.10 (0.72-1.70)                  |
| No longer                                     | <b>1.40 (1.18-1.67)</b>            | 0.90 (0.69-1.17)                  | <b>1.39 (1.16-1.66)</b>            | 0.91 (0.69-1.19)                  |

|                                              |                         |                         |                         |                         |
|----------------------------------------------|-------------------------|-------------------------|-------------------------|-------------------------|
| No                                           | <b>1.28 (1.09-1.51)</b> | 0.82 (0.64-1.06)        | 1.11 (0.94-1.32)        | <b>0.74 (0.57-0.95)</b> |
| <b>Chronic disease</b>                       |                         |                         |                         |                         |
| No                                           | 1                       | 1                       | 1                       | 1                       |
| Kidney disease                               | 1.00 (0.46-2.17)        | <b>3.19 (1.11-9.15)</b> | 1.21 (0.55-2.63)        | <b>3.95 (1.36-11.5)</b> |
| Other disease                                | 1.09 (0.96-1.23)        | <b>1.52 (1.23-1.88)</b> | <b>1.19 (1.04-1.36)</b> | <b>1.68 (1.37-2.07)</b> |
| <b>Body mass index</b>                       |                         |                         |                         |                         |
| Normal                                       | 1                       | 1                       | 1                       | 1                       |
| Underweight                                  | 0.96 (0.72-1.28)        | 0.98 (0.60-1.59)        | 1.00 (0.75-1.34)        | 0.94 (0.57-1.53)        |
| Overweight                                   | 0.86 (0.75-0.98)        | 1.08 (0.86-1.34)        | 0.90 (0.79-1.03)        | 1.11 (0.88-1.40)        |
| Obese                                        | 1.06 (0.89-1.25)        | <b>1.44 (1.09-1.91)</b> | 1.06 (0.89-1.27)        | <b>1.38 (1.04-1.84)</b> |
| <b>Number of persons living in the house</b> |                         |                         |                         |                         |
| 1                                            | 1                       | 1                       | 1                       | 1                       |
| 2                                            | 0.92 (0.75-1.14)        | 1.05 (0.73-1.52)        | 0.99 (0.80-1.22)        | 1.07 (0.74-1.56)        |
| 3 or 4                                       | 1.15 (0.95-1.39)        | 1.35 (0.96-1.91)        | 1.14 (0.93-1.39)        | 1.26 (0.88-1.79)        |
| 5 or more                                    | <b>1.45 (1.17-1.80)</b> | 1.50 (1.01-2.21)        | <b>1.42 (1.12-1.81)</b> | 1.20 (0.77-1.87)        |
| <b>Essential occupations</b>                 |                         |                         |                         |                         |
| No                                           | 1                       | 1                       | 1                       | 1                       |
| Healthcare workers                           | <b>1.72 (1.41-2.10)</b> | <b>3.49 (2.59-4.70)</b> | <b>1.32 (1.05-1.66)</b> | <b>3.46 (2.43-4.93)</b> |
| Others                                       | 1.13 (1.00-1.28)        | <b>1.26 (1.02-1.57)</b> | 1.05 (0.90-1.22)        | <b>1.35 (1.04-1.74)</b> |
| <b>Region</b>                                |                         |                         |                         |                         |
| Least affected regions                       | 1                       | 1                       | 1                       | 1                       |
| Grand Est                                    | <b>2.37 (2.01-2.79)</b> | <b>1.43 (1.05-1.95)</b> | <b>2.40 (2.03-2.84)</b> | <b>1.44 (1.06-1.96)</b> |
| Hauts de France                              | <b>1.41 (1.14-1.73)</b> | <b>1.55 (1.15-2.10)</b> | <b>1.43 (1.16-1.76)</b> | <b>1.53 (1.13-2.08)</b> |
| Ile-de-France                                | <b>3.01 (2.64-3.43)</b> | <b>2.26 (1.79-2.84)</b> | <b>2.47 (2.13-2.86)</b> | <b>2.21 (1.71-2.84)</b> |

Significant associations are indicated in bold.

STROBE Statement—Checklist of items that should be included in reports of *cohort studies*

|                              | Item No | Recommendation                                                                                                                                                                                                                                                                                                         | Page No |
|------------------------------|---------|------------------------------------------------------------------------------------------------------------------------------------------------------------------------------------------------------------------------------------------------------------------------------------------------------------------------|---------|
| <b>Title and abstract</b>    | 1       | (a) Indicate the study's design with a commonly used term in the title or the abstract<br>(b) Provide in the abstract an informative and balanced summary of what was done and what was found                                                                                                                          | 1-2     |
| <b>Introduction</b>          |         |                                                                                                                                                                                                                                                                                                                        |         |
| Background/rationale         | 2       | Explain the scientific background and rationale for the investigation being reported                                                                                                                                                                                                                                   | 4       |
| Objectives                   | 3       | State specific objectives, including any prespecified hypotheses                                                                                                                                                                                                                                                       | 5       |
| <b>Methods</b>               |         |                                                                                                                                                                                                                                                                                                                        |         |
| Study design                 | 4       | Present key elements of study design early in the paper                                                                                                                                                                                                                                                                | 5       |
| Setting                      | 5       | Describe the setting, locations, and relevant dates, including periods of recruitment, exposure, follow-up, and data collection                                                                                                                                                                                        | 5       |
| Participants                 | 6       | (a) Give the eligibility criteria, and the sources and methods of selection of participants. Describe methods of follow-up<br>(b) For matched studies, give matching criteria and number of exposed and unexposed                                                                                                      | 5       |
| Variables                    | 7       | Clearly define all outcomes, exposures, predictors, potential confounders, and effect modifiers. Give diagnostic criteria, if applicable                                                                                                                                                                               | 6-8     |
| Data sources/<br>measurement | 8*      | For each variable of interest, give sources of data and details of methods of assessment (measurement). Describe comparability of assessment methods if there is more than one group                                                                                                                                   | 6-8     |
| Bias                         | 9       | Describe any efforts to address potential sources of bias                                                                                                                                                                                                                                                              | 8       |
| Study size                   | 10      | Explain how the study size was arrived at                                                                                                                                                                                                                                                                              | 8       |
| Quantitative variables       | 11      | Explain how quantitative variables were handled in the analyses. If applicable, describe which groupings were chosen and why                                                                                                                                                                                           | NA      |
| Statistical methods          | 12      | (a) Describe all statistical methods, including those used to control for confounding<br>(b) Describe any methods used to examine subgroups and interactions<br>(c) Explain how missing data were addressed<br>(d) If applicable, explain how loss to follow-up was addressed<br>(e) Describe any sensitivity analyses | 8       |
| <b>Results</b>               |         |                                                                                                                                                                                                                                                                                                                        |         |
| Participants                 | 13*     | (a) Report numbers of individuals at each stage of study—eg numbers potentially eligible, examined for eligibility, confirmed eligible, included in the study, completing follow-up, and analysed<br>(b) Give reasons for non-participation at each stage<br>(c) Consider use of a flow diagram                        | 8       |
| Descriptive data             | 14*     | (a) Give characteristics of study participants (eg demographic, clinical, social) and information on exposures and potential confounders<br>(b) Indicate number of participants with missing data for each variable of interest<br>(c) Summarise follow-up time (eg, average and total amount)                         | 8-10    |
| Outcome data                 | 15*     | Report numbers of outcome events or summary measures over time                                                                                                                                                                                                                                                         | 8-10    |

|    |                          |    |                                                                                                                                                                                                              |       |
|----|--------------------------|----|--------------------------------------------------------------------------------------------------------------------------------------------------------------------------------------------------------------|-------|
| 1  | Main results             | 16 | (a) Give unadjusted estimates and, if applicable, confounder-adjusted estimates and their precision (eg, 95% confidence interval). Make clear which confounders were adjusted for and why they were included | 8-16  |
| 2  |                          |    | (b) Report category boundaries when continuous variables were categorized                                                                                                                                    |       |
| 3  |                          |    | (c) If relevant, consider translating estimates of relative risk into absolute risk for a meaningful time period                                                                                             |       |
| 4  |                          |    |                                                                                                                                                                                                              |       |
| 5  |                          |    |                                                                                                                                                                                                              |       |
| 6  |                          |    |                                                                                                                                                                                                              |       |
| 7  |                          |    |                                                                                                                                                                                                              |       |
| 8  |                          |    |                                                                                                                                                                                                              |       |
| 9  | Other analyses           | 17 | Report other analyses done—eg analyses of subgroups and interactions, and sensitivity analyses                                                                                                               | 8-16  |
| 10 |                          |    |                                                                                                                                                                                                              |       |
| 11 | <b>Discussion</b>        |    |                                                                                                                                                                                                              |       |
| 12 |                          |    |                                                                                                                                                                                                              |       |
| 13 | Key results              | 18 | Summarise key results with reference to study objectives                                                                                                                                                     | 17    |
| 14 | Limitations              | 19 | Discuss limitations of the study, taking into account sources of potential bias or imprecision. Discuss both direction and magnitude of any potential bias                                                   | 19    |
| 15 |                          |    |                                                                                                                                                                                                              |       |
| 16 | Interpretation           | 20 | Give a cautious overall interpretation of results considering objectives, limitations, multiplicity of analyses, results from similar studies, and other relevant evidence                                   | 17-19 |
| 17 |                          |    |                                                                                                                                                                                                              |       |
| 18 |                          |    |                                                                                                                                                                                                              |       |
| 19 | Generalisability         | 21 | Discuss the generalisability (external validity) of the study results                                                                                                                                        | 20    |
| 20 |                          |    |                                                                                                                                                                                                              |       |
| 21 | <b>Other information</b> |    |                                                                                                                                                                                                              |       |
| 22 | Funding                  | 22 | Give the source of funding and the role of the funders for the present study and, if applicable, for the original study on which the present article is based                                                | 21    |
| 23 |                          |    |                                                                                                                                                                                                              |       |
| 24 |                          |    |                                                                                                                                                                                                              |       |

\*Give information separately for exposed and unexposed groups.

**Note:** An Explanation and Elaboration article discusses each checklist item and gives methodological background and published examples of transparent reporting. The STROBE checklist is best used in conjunction with this article (freely available on the Web sites of PLoS Medicine at <http://www.plosmedicine.org/>, Annals of Internal Medicine at <http://www.annals.org/>, and Epidemiology at <http://www.epidem.com/>). Information on the STROBE Initiative is available at <http://www.strobe-statement.org>.
