# Supplementary material for: Social inequalities and dynamics of the early COVID-19 epidemic: a prospective cohort study in France
Source: PubMed Central journal article supplement — BMJ Open. 2021 Nov 10;11(11):e052888. doi: 10.1136/bmjopen-2021-052888 (PMC8587531; doi:10.1136/bmjopen-2021-052888), 2021-11-10
Supplement: bmjopen-2021-052888supp001.pdf [file bmjopen-2021-052888supp001.pdf]

Supplementary Table 1

Factors associated with anosmia/ageusia during or after the epidemic peak (as compared to no reported anosmia/ageusia starting after lockdown). Multinomial logistic regressions.

|                                               | Crude model                        |                                   | Full adjusted model                |                                   |
|-----------------------------------------------|------------------------------------|-----------------------------------|------------------------------------|-----------------------------------|
|                                               | <i>During peak<br/>OR (95% CI)</i> | <i>After peak<br/>OR (95% CI)</i> | <i>During peak<br/>OR (95% CI)</i> | <i>After peak<br/>OR (95% CI)</i> |
| <b>Age</b>                                    |                                    |                                   |                                    |                                   |
| 18-24                                         | 1                                  | 1                                 | 1                                  | 1                                 |
| 25-34                                         | <b>1.68 (1.36-2.07)</b>            | 1.18 (0.87-1.60)                  | <b>1.51 (1.20-1.91)</b>            | 0.93 (0.65-1.33)                  |
| 35-44                                         | <b>1.56 (1.27-1.91)</b>            | 1.22 (0.91-1.65)                  | <b>1.39 (1.11-1.74)</b>            | 0.90 (0.64-1.27)                  |
| 45-54                                         | <b>1.43 (1.17-1.74)</b>            | 0.86 (0.63-1.18)                  | <b>1.34 (1.07-1.67)</b>            | <b>0.64 (0.44-0.91)</b>           |
| 55-64                                         | 0.89 (0.71-1.11)                   | 0.76 (0.54-1.06)                  | 0.92 (0.72-1.18)                   | <b>0.59 (0.38-0.91)</b>           |
| <b>Sex</b>                                    |                                    |                                   |                                    |                                   |
| Men                                           | 1                                  | 1                                 | 1                                  | 1                                 |
| Women                                         | <b>1.57 (1.40-1.76)</b>            | <b>1.40 (1.14-1.71)</b>           | <b>1.48 (1.31-1.68)</b>            | <b>1.27 (1.02-1.59)</b>           |
| <b>Ethno-racial status</b>                    |                                    |                                   |                                    |                                   |
| Mainstream population                         | 1                                  | 1                                 | 1                                  | 1                                 |
| Non-racialized first-generation immigrants    | <b>1.52 (1.16-2.00)</b>            | <b>2.00 (1.14-3.53)</b>           | 1.27 (0.97-1.68)                   | <b>1.85 (1.09-3.17)</b>           |
| Non-racialized second-generation immigrants   | <b>1.40 (1.07-1.82)</b>            | 1.16 (0.77-1.76)                  | 1.26 (0.97-1.64)                   | 1.08 (0.72-1.64)                  |
| Racialized first-generation immigrants        | <b>1.46 (1.18-1.80)</b>            | 1.20 (0.82-1.75)                  | 1.09 (0.87-1.36)                   | 0.96 (0.65-1.43)                  |
| Racialized second generation immigrants       | <b>2.01 (1.63-2.48)</b>            | <b>1.87 (1.34-2.63)</b>           | <b>1.44 (1.16-1.79)</b>            | <b>1.42 (1.00-2.01)</b>           |
| DOM or descendants of DOM native              | <b>2.01 (1.43-2.81)</b>            | <b>2.02 (1.21-3.36)</b>           | <b>1.50 (1.06-2.11)</b>            | 1.44 (0.85-2.42)                  |
| <b>Social class</b>                           |                                    |                                   |                                    |                                   |
| Self-employed and entrepreneurs               | <b>0.62 (0.47-0.83)</b>            | 1.30 (0.77-2.19)                  | 0.80 (0.59-1.09)                   | 1.44 (0.84-2.45)                  |
| Senior executive professionals                | 1                                  | 1                                 | 1                                  | 1                                 |
| Middle executive professionals                | 0.93 (0.79-1.10)                   | <b>1.47 (1.09-1.98)</b>           | 1.02 (0.86-1.21)                   | 1.18 (0.86-1.61)                  |
| Skilled employees                             | 0.99 (0.81-1.21)                   | 1.07 (0.73-1.58)                  | 0.96 (0.78-1.19)                   | 0.93 (0.62-1.39)                  |
| Low-skilled employees                         | <b>0.76 (0.64-0.91)</b>            | 1.23 (0.90-1.68)                  | 0.82 (0.67-1.00)                   | 1.05 (0.74-1.49)                  |
| Skilled manual workers                        | <b>0.47 (0.35-0.62)</b>            | 0.83 (0.55-1.24)                  | <b>0.64 (0.48-0.85)</b>            | 0.84 (0.54-1.31)                  |
| Low-skilled manual workers                    | <b>0.52 (0.35-0.79)</b>            | 0.93 (0.57-1.54)                  | 0.68 (0.44-1.04)                   | 0.92 (0.54-1.56)                  |
| Never worked and others                       | <b>0.64 (0.54-0.77)</b>            | 0.94 (0.67-1.33)                  | 0.81 (0.65-1.02)                   | 0.89 (0.56-1.41)                  |
| <b>High density of the place of residence</b> |                                    |                                   |                                    |                                   |
| No                                            | 1                                  | 1                                 | 1                                  | 1                                 |
| Yes                                           | <b>1.83 (1.64-2.05)</b>            | <b>1.38 (1.14-1.68)</b>           | <b>1.24 (1.08-1.41)</b>            | 0.97 (0.77-1.23)                  |
| <b>Overcrowded housing</b>                    |                                    |                                   |                                    |                                   |
| No                                            | 1                                  | 1                                 | 1                                  | 1                                 |
| Yes                                           | <b>1.38 (1.19-1.62)</b>            | <b>1.74 (1.32-2.31)</b>           | 0.92 (0.77-1.10)                   | <b>1.35 (0.96-1.90)</b>           |
| <b>Working arrangement during lockdown</b>    |                                    |                                   |                                    |                                   |
| Remote working only                           | 1                                  | 1                                 | 1                                  | 1                                 |
| Not working and others                        | <b>0.65 (0.56-0.76)</b>            | 1.13 (0.84-1.53)                  | 0.99 (0.81-1.22)                   | 1.38 (0.96-1.99)                  |
| Working outside the home partly or only       | <b>0.80 (0.69-0.92)</b>            | <b>1.36 (1.03-1.81)</b>           | 1.14 (0.96-1.34)                   | 1.25 (0.92-1.70)                  |
| <b>Smoking</b>                                |                                    |                                   |                                    |                                   |
| Daily                                         | 1                                  | 1                                 | 1                                  | 1                                 |
| Occasionally                                  | <b>1.63 (1.25-2.13)</b>            | 1.13 (0.74-1.73)                  | <b>1.50 (1.14-1.96)</b>            | 1.10 (0.72-1.70)                  |
| No longer                                     | <b>1.40 (1.18-1.67)</b>            | 0.90 (0.69-1.17)                  | <b>1.39 (1.16-1.66)</b>            | 0.91 (0.69-1.19)                  |

|                                              |                         |                         |                         |                         |
|----------------------------------------------|-------------------------|-------------------------|-------------------------|-------------------------|
| No                                           | <b>1.28 (1.09-1.51)</b> | 0.82 (0.64-1.06)        | 1.11 (0.94-1.32)        | <b>0.74 (0.57-0.95)</b> |
| <b>Chronic disease</b>                       |                         |                         |                         |                         |
| No                                           | 1                       | 1                       | 1                       | 1                       |
| Kidney disease                               | 1.00 (0.46-2.17)        | <b>3.19 (1.11-9.15)</b> | 1.21 (0.55-2.63)        | <b>3.95 (1.36-11.5)</b> |
| Other disease                                | 1.09 (0.96-1.23)        | <b>1.52 (1.23-1.88)</b> | <b>1.19 (1.04-1.36)</b> | <b>1.68 (1.37-2.07)</b> |
| <b>Body mass index</b>                       |                         |                         |                         |                         |
| Normal                                       | 1                       | 1                       | 1                       | 1                       |
| Underweight                                  | 0.96 (0.72-1.28)        | 0.98 (0.60-1.59)        | 1.00 (0.75-1.34)        | 0.94 (0.57-1.53)        |
| Overweight                                   | 0.86 (0.75-0.98)        | 1.08 (0.86-1.34)        | 0.90 (0.79-1.03)        | 1.11 (0.88-1.40)        |
| Obese                                        | 1.06 (0.89-1.25)        | <b>1.44 (1.09-1.91)</b> | 1.06 (0.89-1.27)        | <b>1.38 (1.04-1.84)</b> |
| <b>Number of persons living in the house</b> |                         |                         |                         |                         |
| 1                                            | 1                       | 1                       | 1                       | 1                       |
| 2                                            | 0.92 (0.75-1.14)        | 1.05 (0.73-1.52)        | 0.99 (0.80-1.22)        | 1.07 (0.74-1.56)        |
| 3 or 4                                       | 1.15 (0.95-1.39)        | 1.35 (0.96-1.91)        | 1.14 (0.93-1.39)        | 1.26 (0.88-1.79)        |
| 5 or more                                    | <b>1.45 (1.17-1.80)</b> | 1.50 (1.01-2.21)        | <b>1.42 (1.12-1.81)</b> | 1.20 (0.77-1.87)        |
| <b>Essential occupations</b>                 |                         |                         |                         |                         |
| No                                           | 1                       | 1                       | 1                       | 1                       |
| Healthcare workers                           | <b>1.72 (1.41-2.10)</b> | <b>3.49 (2.59-4.70)</b> | <b>1.32 (1.05-1.66)</b> | <b>3.46 (2.43-4.93)</b> |
| Others                                       | 1.13 (1.00-1.28)        | <b>1.26 (1.02-1.57)</b> | 1.05 (0.90-1.22)        | <b>1.35 (1.04-1.74)</b> |
| <b>Region</b>                                |                         |                         |                         |                         |
| Least affected regions                       | 1                       | 1                       | 1                       | 1                       |
| Grand Est                                    | <b>2.37 (2.01-2.79)</b> | <b>1.43 (1.05-1.95)</b> | <b>2.40 (2.03-2.84)</b> | <b>1.44 (1.06-1.96)</b> |
| Hauts de France                              | <b>1.41 (1.14-1.73)</b> | <b>1.55 (1.15-2.10)</b> | <b>1.43 (1.16-1.76)</b> | <b>1.53 (1.13-2.08)</b> |
| Ile-de-France                                | <b>3.01 (2.64-3.43)</b> | <b>2.26 (1.79-2.84)</b> | <b>2.47 (2.13-2.86)</b> | <b>2.21 (1.71-2.84)</b> |

Significant associations are indicated in bold.
